# Supplementary material
Source: publisher site journal article supplement (https://www.spandidos-publications.com/7322/downloadSupplementary)
Supplement: Supplementary file 1 [file downloadSupplementary]

## Sheet: Table S4
Table SIV. Differentiall expressed genes between epithelial cells and other cell types.
	p_val	avg_log2FC	pct.1	pct.2	p_val_adj	cluster	gene	group
CLU	0	3.83631	0.943	0.21	0	Epithelial cells	CLU	up
TG	0	3.71249	0.726	0.093	0	Epithelial cells	TG	up
C2orf40	0	3.38942	0.569	0.036	0	Epithelial cells	C2orf40	up
MGST1	0	2.95843	0.802	0.078	0	Epithelial cells	MGST1	up
WFDC2	0	2.77975	0.627	0.038	0	Epithelial cells	WFDC2	up
IGFBP5	0	2.69324	0.505	0.073	0	Epithelial cells	IGFBP5	up
KRT7	0	2.6619	0.751	0.076	0	Epithelial cells	KRT7	up
S100A13	0	2.61352	0.81	0.127	0	Epithelial cells	S100A13	up
KRT19	0	2.57581	0.604	0.051	0	Epithelial cells	KRT19	up
EPCAM	0	2.56283	0.738	0.046	0	Epithelial cells	EPCAM	up
S100A1	0	2.50005	0.74	0.076	0	Epithelial cells	S100A1	up
CD24	0	2.48818	0.762	0.093	0	Epithelial cells	CD24	up
FN1	0	2.45769	0.892	0.275	0	Epithelial cells	FN1	up
SLPI	0	2.4361	0.5	0.057	0	Epithelial cells	SLPI	up
CXCL14	0	2.4178	0.348	0.07	0	Epithelial cells	CXCL14	up
KRT18	0	2.40343	0.715	0.057	0	Epithelial cells	KRT18	up
NPC2	0	2.40193	0.828	0.378	0	Epithelial cells	NPC2	up
TACSTD2	0	2.40149	0.569	0.053	0	Epithelial cells	TACSTD2	up
CST6	0	2.38456	0.575	0.044	0	Epithelial cells	CST6	up
ATP1B1	0	2.3263	0.741	0.114	0	Epithelial cells	ATP1B1	up
CAV1	0	2.30463	0.628	0.113	0	Epithelial cells	CAV1	up
SPINT2	0	2.29774	0.738	0.169	0	Epithelial cells	SPINT2	up
TSC22D1	0	2.2916	0.65	0.149	0	Epithelial cells	TSC22D1	up
APLP2	0	2.27443	0.814	0.259	0	Epithelial cells	APLP2	up
TFF3	0	2.23133	0.165	0.046	0	Epithelial cells	TFF3	up
ZCCHC12	0	2.21682	0.317	0.019	0	Epithelial cells	ZCCHC12	up
CLDN4	0	2.19835	0.655	0.047	0	Epithelial cells	CLDN4	up
S100A6	0	2.16084	0.997	0.833	0	Epithelial cells	S100A6	up
KRT8	0	2.13828	0.639	0.048	0	Epithelial cells	KRT8	up
CLDN3	0	2.10787	0.606	0.034	0	Epithelial cells	CLDN3	up
GPX3	0	2.06818	0.539	0.08	0	Epithelial cells	GPX3	up
SLC34A2	0	2.06717	0.627	0.08	0	Epithelial cells	SLC34A2	up
DSP	0	2.00489	0.597	0.053	0	Epithelial cells	DSP	up
CAV2	0	1.99103	0.598	0.063	0	Epithelial cells	CAV2	up
S100A2	0	1.9696	0.184	0.022	0	Epithelial cells	S100A2	up
SFTPB	0	1.96187	0.318	0.047	0	Epithelial cells	SFTPB	up
CLDN7	0	1.94102	0.611	0.046	0	Epithelial cells	CLDN7	up
CTSB	0	1.84241	0.852	0.313	0	Epithelial cells	CTSB	up
SDC4	0	1.8293	0.55	0.057	0	Epithelial cells	SDC4	up
PEBP1	0	1.80766	0.823	0.373	0	Epithelial cells	PEBP1	up
MDK	0	1.78861	0.487	0.052	0	Epithelial cells	MDK	up
PAX8	0	1.78468	0.526	0.034	0	Epithelial cells	PAX8	up
TM4SF1	0	1.78007	0.448	0.068	0	Epithelial cells	TM4SF1	up
IGSF1	0	1.77941	0.47	0.032	0	Epithelial cells	IGSF1	up
S100A14	0	1.75655	0.508	0.033	0	Epithelial cells	S100A14	up
ARMCX3	0	1.74578	0.404	0.117	0	Epithelial cells	ARMCX3	up
SERPINA1	0	1.7425	0.654	0.155	0	Epithelial cells	SERPINA1	up
NKX2-1	0	1.74136	0.542	0.025	0	Epithelial cells	NKX2-1	up
LGALS3	0	1.73455	0.838	0.308	0	Epithelial cells	LGALS3	up
LCN12	0	1.71995	0.436	0.015	0	Epithelial cells	LCN12	up
PERP	0	1.71152	0.577	0.079	0	Epithelial cells	PERP	up
TSPAN1	0	1.70863	0.381	0.021	0	Epithelial cells	TSPAN1	up
HOPX	0	1.70208	0.669	0.177	0	Epithelial cells	HOPX	up
MUC15	0	1.67355	0.46	0.015	0	Epithelial cells	MUC15	up
SFTA3	0	1.6726	0.47	0.017	0	Epithelial cells	SFTA3	up
LCN2	0	1.67098	0.169	0.016	0	Epithelial cells	LCN2	up
LMO3	0	1.66863	0.488	0.025	0	Epithelial cells	LMO3	up
PDLIM1	0	1.65971	0.608	0.096	0	Epithelial cells	PDLIM1	up
TSHR	0	1.6581	0.447	0.016	0	Epithelial cells	TSHR	up
CRYAB	0	1.65202	0.284	0.048	0	Epithelial cells	CRYAB	up
PRSS23	0	1.65137	0.452	0.083	0	Epithelial cells	PRSS23	up
DHRS3	0	1.65071	0.499	0.083	0	Epithelial cells	DHRS3	up
CCND1	0	1.64089	0.554	0.089	0	Epithelial cells	CCND1	up
AGR2	0	1.62284	0.327	0.008	0	Epithelial cells	AGR2	up
CLIC3	0	1.62132	0.481	0.111	0	Epithelial cells	CLIC3	up
GSTP1	0	1.59395	0.853	0.439	0	Epithelial cells	GSTP1	up
NMB	0	1.58924	0.346	0.044	0	Epithelial cells	NMB	up
TSTD1	0	1.56536	0.695	0.238	0	Epithelial cells	TSTD1	up
SLC26A7	0	1.55083	0.294	0.01	0	Epithelial cells	SLC26A7	up
CD9	0	1.54878	0.72	0.236	0	Epithelial cells	CD9	up
PRDX5	0	1.52358	0.749	0.34	0	Epithelial cells	PRDX5	up
CAMK2N1	0	1.52063	0.435	0.043	0	Epithelial cells	CAMK2N1	up
NTRK2	0	1.50215	0.431	0.02	0	Epithelial cells	NTRK2	up
PLPP3	0	1.50093	0.485	0.052	0	Epithelial cells	PLPP3	up
ASAH1	0	1.50017	0.674	0.229	0	Epithelial cells	ASAH1	up
SOX4	0	1.49783	0.542	0.108	0	Epithelial cells	SOX4	up
KCNJ16	0	1.49584	0.397	0.016	0	Epithelial cells	KCNJ16	up
CDH1	0	1.4904	0.449	0.022	0	Epithelial cells	CDH1	up
IYD	0	1.47535	0.337	0.017	0	Epithelial cells	IYD	up
C19orf33	0	1.47514	0.404	0.022	0	Epithelial cells	C19orf33	up
SORD	0	1.47095	0.373	0.029	0	Epithelial cells	SORD	up
DAPK2	0	1.46134	0.416	0.033	0	Epithelial cells	DAPK2	up
ID4	0	1.45617	0.42	0.035	0	Epithelial cells	ID4	up
HSP90B1	0	1.44969	0.805	0.442	0	Epithelial cells	HSP90B1	up
IGFBP6	0	1.43816	0.404	0.073	0	Epithelial cells	IGFBP6	up
MPZL2	0	1.43629	0.454	0.038	0	Epithelial cells	MPZL2	up
MAOA	0	1.42116	0.358	0.015	0	Epithelial cells	MAOA	up
DUSP6	0	1.41801	0.54	0.135	0	Epithelial cells	DUSP6	up
CPE	0	1.41544	0.476	0.063	0	Epithelial cells	CPE	up
TPD52L1	0	1.41234	0.388	0.018	0	Epithelial cells	TPD52L1	up
DAPL1	0	1.38755	0.387	0.024	0	Epithelial cells	DAPL1	up
MAL2	0	1.37701	0.383	0.016	0	Epithelial cells	MAL2	up
MET	0	1.37609	0.412	0.02	0	Epithelial cells	MET	up
TESC	0	1.35781	0.331	0.055	0	Epithelial cells	TESC	up
MXRA7	0	1.3575	0.485	0.062	0	Epithelial cells	MXRA7	up
MGAT4C	0	1.34951	0.338	0.007	0	Epithelial cells	MGAT4C	up
TNFRSF12A	0	1.3449	0.405	0.038	0	Epithelial cells	TNFRSF12A	up
AK1	0	1.33541	0.412	0.051	0	Epithelial cells	AK1	up
PLS3	0	1.33473	0.468	0.056	0	Epithelial cells	PLS3	up
PCP4	0	1.31099	0.261	0.011	0	Epithelial cells	PCP4	up
KIAA1217	0	1.3015	0.386	0.025	0	Epithelial cells	KIAA1217	up
CTSH	0	1.29025	0.478	0.205	0	Epithelial cells	CTSH	up
GNAS	0	1.28872	0.815	0.479	0	Epithelial cells	GNAS	up
CLDN1	0	1.28795	0.401	0.075	0	Epithelial cells	CLDN1	up
NPNT	0	1.28425	0.387	0.018	0	Epithelial cells	NPNT	up
MUC1	0	1.27153	0.242	0.018	0	Epithelial cells	MUC1	up
SDC2	0	1.27128	0.401	0.042	0	Epithelial cells	SDC2	up
APOE	0	1.26128	0.459	0.185	0	Epithelial cells	APOE	up
ID1	0	1.24937	0.375	0.069	0	Epithelial cells	ID1	up
VEGFA	0	1.24781	0.433	0.075	0	Epithelial cells	VEGFA	up
PDLIM4	0	1.24754	0.369	0.026	0	Epithelial cells	PDLIM4	up
DMKN	0	1.24495	0.398	0.016	0	Epithelial cells	DMKN	up
NDUFC2	0	1.24241	0.658	0.341	0	Epithelial cells	NDUFC2	up
GPRC5A	0	1.23689	0.323	0.016	0	Epithelial cells	GPRC5A	up
ARHGAP36	0	1.22936	0.181	0.006	0	Epithelial cells	ARHGAP36	up
CHI3L1	0	1.22503	0.18	0.023	0	Epithelial cells	CHI3L1	up
CITED1	0	1.21812	0.231	0.012	0	Epithelial cells	CITED1	up
BHLHE41	0	1.21248	0.438	0.086	0	Epithelial cells	BHLHE41	up
ELF3	0	1.2065	0.209	0.015	0	Epithelial cells	ELF3	up
PDZK1IP1	0	1.20589	0.222	0.015	0	Epithelial cells	PDZK1IP1	up
NAPSA	0	1.20419	0.167	0.013	0	Epithelial cells	NAPSA	up
CKB	0	1.20403	0.378	0.045	0	Epithelial cells	CKB	up
TIMP1	0	1.19119	0.76	0.301	0	Epithelial cells	TIMP1	up
CHPT1	0	1.18563	0.373	0.082	0	Epithelial cells	CHPT1	up
ZNF486	0	1.18528	0.31	0.021	0	Epithelial cells	ZNF486	up
TMEM98	0	1.18286	0.374	0.026	0	Epithelial cells	TMEM98	up
C8orf4	0	1.17263	0.214	0.043	0	Epithelial cells	C8orf4	up
PDE5A	0	1.1652	0.364	0.032	0	Epithelial cells	PDE5A	up
SLC5A3	0	1.15338	0.413	0.077	0	Epithelial cells	SLC5A3	up
MRPS6	0	1.14318	0.552	0.219	0	Epithelial cells	MRPS6	up
SLC25A29	0	1.14023	0.337	0.026	0	Epithelial cells	SLC25A29	up
PLOD2	0	1.13959	0.355	0.023	0	Epithelial cells	PLOD2	up
PROS1	0	1.1356	0.361	0.037	0	Epithelial cells	PROS1	up
GDF15	0	1.13524	0.191	0.022	0	Epithelial cells	GDF15	up
CLDN16	0	1.13194	0.247	0.015	0	Epithelial cells	CLDN16	up
RAB25	0	1.10751	0.316	0.012	0	Epithelial cells	RAB25	up
RRBP1	0	1.10718	0.517	0.154	0	Epithelial cells	RRBP1	up
TBX3	0	1.10155	0.339	0.024	0	Epithelial cells	TBX3	up
NUPR1	0	1.10061	0.283	0.077	0	Epithelial cells	NUPR1	up
TMEM238	0	1.09905	0.367	0.046	0	Epithelial cells	TMEM238	up
ANXA1	0	1.0957	0.841	0.572	0	Epithelial cells	ANXA1	up
FUCA1	0	1.09476	0.391	0.063	0	Epithelial cells	FUCA1	up
SVIL	0	1.08725	0.372	0.054	0	Epithelial cells	SVIL	up
CD63	0	1.08283	0.845	0.517	0	Epithelial cells	CD63	up
CCDC80	0	1.07844	0.319	0.039	0	Epithelial cells	CCDC80	up
APOC1	0	1.07126	0.396	0.124	0	Epithelial cells	APOC1	up
NEAT1	0	1.06691	0.879	0.621	0	Epithelial cells	NEAT1	up
PGRMC1	0	1.06515	0.436	0.088	0	Epithelial cells	PGRMC1	up
CTTN	0	1.06301	0.364	0.041	0	Epithelial cells	CTTN	up
STXBP6	0	1.06111	0.308	0.012	0	Epithelial cells	STXBP6	up
LRRK2	0	1.06101	0.318	0.05	0	Epithelial cells	LRRK2	up
GPX4	0	1.06074	0.768	0.472	0	Epithelial cells	GPX4	up
NGFRAP1	0	1.05983	0.464	0.111	0	Epithelial cells	NGFRAP1	up
HSPA5	0	1.05313	0.615	0.334	0	Epithelial cells	HSPA5	up
CPQ	0	1.04914	0.372	0.071	0	Epithelial cells	CPQ	up
LMO7	0	1.04473	0.321	0.034	0	Epithelial cells	LMO7	up
CTNNAL1	0	1.04191	0.34	0.033	0	Epithelial cells	CTNNAL1	up
HSD17B6	0	1.03439	0.247	0.006	0	Epithelial cells	HSD17B6	up
PCSK1N	0	1.03203	0.237	0.027	0	Epithelial cells	PCSK1N	up
BEX2	0	1.03119	0.354	0.041	0	Epithelial cells	BEX2	up
TPO	0	1.02766	0.107	0.007	0	Epithelial cells	TPO	up
GCSH	0	1.02634	0.369	0.054	0	Epithelial cells	GCSH	up
GGCT	0	1.02503	0.355	0.095	0	Epithelial cells	GGCT	up
CLTA	0	1.02409	0.66	0.323	0	Epithelial cells	CLTA	up
SELM	0	1.02273	0.512	0.154	0	Epithelial cells	SELM	up
GRAMD3	0	1.01735	0.314	0.04	0	Epithelial cells	GRAMD3	up
TXNL1	0	1.00445	0.492	0.189	0	Epithelial cells	TXNL1	up
HACD3	0	0.998422	0.4	0.079	0	Epithelial cells	HACD3	up
TMED4	0	0.997123	0.518	0.165	0	Epithelial cells	TMED4	up
COL8A1	0	0.991414	0.307	0.022	0	Epithelial cells	COL8A1	up
MBIP	0	0.986183	0.377	0.064	0	Epithelial cells	MBIP	up
SH3YL1	0	0.985458	0.375	0.062	0	Epithelial cells	SH3YL1	up
FKBP2	0	0.984456	0.569	0.229	0	Epithelial cells	FKBP2	up
SPINT1	0	0.975526	0.305	0.035	0	Epithelial cells	SPINT1	up
ITGA3	0	0.968925	0.265	0.019	0	Epithelial cells	ITGA3	up
CD55	0	0.966394	0.433	0.193	0	Epithelial cells	CD55	up
PRDX1	0	0.964408	0.747	0.465	0	Epithelial cells	PRDX1	up
C4orf48	0	0.962995	0.515	0.249	0	Epithelial cells	C4orf48	up
KCNJ15	0	0.950561	0.252	0.015	0	Epithelial cells	KCNJ15	up
NELL2	0	0.949571	0.299	0.033	0	Epithelial cells	NELL2	up
SLC17A5	0	0.941857	0.308	0.038	0	Epithelial cells	SLC17A5	up
DPP4	0	0.932936	0.275	0.03	0	Epithelial cells	DPP4	up
PRDX2	0	0.926802	0.542	0.217	0	Epithelial cells	PRDX2	up
LIPH	0	0.926189	0.232	0.007	0	Epithelial cells	LIPH	up
PCBD1	0	0.924743	0.4	0.096	0	Epithelial cells	PCBD1	up
CTGF	0	0.923167	0.178	0.04	0	Epithelial cells	CTGF	up
PHLDA2	0	0.922767	0.318	0.054	0	Epithelial cells	PHLDA2	up
MARCKSL1	0	0.919027	0.445	0.131	0	Epithelial cells	MARCKSL1	up
SCX	0	0.916287	0.222	0.011	0	Epithelial cells	SCX	up
TTC3	0	0.907075	0.514	0.19	0	Epithelial cells	TTC3	up
C16orf89	0	0.906812	0.253	0.007	0	Epithelial cells	C16orf89	up
FLRT3	0	0.906792	0.197	0.008	0	Epithelial cells	FLRT3	up
CADM1	0	0.906443	0.334	0.045	0	Epithelial cells	CADM1	up
DSTN	0	0.90617	0.639	0.289	0	Epithelial cells	DSTN	up
LONRF2	0	0.904781	0.218	0.009	0	Epithelial cells	LONRF2	up
MYH10	0	0.900788	0.265	0.025	0	Epithelial cells	MYH10	up
ANXA3	0	0.899641	0.226	0.014	0	Epithelial cells	ANXA3	up
KCNJ2	0	0.899035	0.157	0.02	0	Epithelial cells	KCNJ2	up
MT-ND4L	0	0.897742	0.897	0.639	0	Epithelial cells	MT-ND4L	up
KDELR1	0	0.894038	0.512	0.189	0	Epithelial cells	KDELR1	up
BEX4	0	0.89038	0.432	0.133	0	Epithelial cells	BEX4	up
ATL2	0	0.887879	0.288	0.039	0	Epithelial cells	ATL2	up
CXADR	0	0.88769	0.264	0.008	0	Epithelial cells	CXADR	up
FRMD3	0	0.886624	0.25	0.016	0	Epithelial cells	FRMD3	up
DIO2	0	0.883358	0.204	0.009	0	Epithelial cells	DIO2	up
PCYOX1	0	0.879541	0.323	0.047	0	Epithelial cells	PCYOX1	up
MTCH1	0	0.879075	0.459	0.16	0	Epithelial cells	MTCH1	up
CFH	0	0.879029	0.287	0.057	0	Epithelial cells	CFH	up
UACA	0	0.877883	0.329	0.063	0	Epithelial cells	UACA	up
NDUFA4	0	0.871482	0.792	0.586	0	Epithelial cells	NDUFA4	up
RP11-532F12.5	0	0.871037	0.277	0.013	0	Epithelial cells	RP11-532F12.5	up
TMEM87A	0	0.866043	0.429	0.123	0	Epithelial cells	TMEM87A	up
PPIC	0	0.862552	0.326	0.049	0	Epithelial cells	PPIC	up
FAM3C	0	0.85965	0.454	0.131	0	Epithelial cells	FAM3C	up
SNHG8	0	0.859524	0.576	0.318	0	Epithelial cells	SNHG8	up
SQSTM1	0	0.857993	0.641	0.321	0	Epithelial cells	SQSTM1	up
SMIM1	0	0.857245	0.27	0.014	0	Epithelial cells	SMIM1	up
TMEM59	0	0.856641	0.682	0.461	0	Epithelial cells	TMEM59	up
ANXA2	0	0.854882	0.747	0.423	0	Epithelial cells	ANXA2	up
PLA2G16	0	0.85285	0.433	0.149	0	Epithelial cells	PLA2G16	up
LTBP3	0	0.852754	0.314	0.058	0	Epithelial cells	LTBP3	up
OCIAD2	0	0.851005	0.528	0.208	0	Epithelial cells	OCIAD2	up
SNHG7	0	0.850418	0.388	0.146	0	Epithelial cells	SNHG7	up
DDIT3	0	0.845553	0.366	0.127	0	Epithelial cells	DDIT3	up
RAB34	0	0.845395	0.344	0.066	0	Epithelial cells	RAB34	up
AP1M2	0	0.844885	0.253	0.007	0	Epithelial cells	AP1M2	up
TSPAN3	0	0.842975	0.38	0.083	0	Epithelial cells	TSPAN3	up
COL14A1	0	0.842322	0.241	0.024	0	Epithelial cells	COL14A1	up
LAMB3	0	0.842143	0.183	0.014	0	Epithelial cells	LAMB3	up
CPVL	0	0.84083	0.396	0.115	0	Epithelial cells	CPVL	up
SERINC2	0	0.83868	0.248	0.018	0	Epithelial cells	SERINC2	up
PDE8B	0	0.838114	0.251	0.01	0	Epithelial cells	PDE8B	up
NDUFB2	0	0.832589	0.724	0.487	0	Epithelial cells	NDUFB2	up
LMAN1	0	0.83084	0.485	0.184	0	Epithelial cells	LMAN1	up
CD59	0	0.824817	0.571	0.214	0	Epithelial cells	CD59	up
CD151	0	0.824024	0.448	0.125	0	Epithelial cells	CD151	up
SEPW1	0	0.820853	0.554	0.292	0	Epithelial cells	SEPW1	up
KLF5	0	0.82039	0.214	0.015	0	Epithelial cells	KLF5	up
DSG2	0	0.819215	0.218	0.011	0	Epithelial cells	DSG2	up
BCAM	0	0.817784	0.27	0.033	0	Epithelial cells	BCAM	up
OCLN	0	0.816768	0.242	0.013	0	Epithelial cells	OCLN	up
NDUFC1	0	0.816658	0.561	0.269	0	Epithelial cells	NDUFC1	up
SMIM14	0	0.816218	0.418	0.127	0	Epithelial cells	SMIM14	up
CYSTM1	0	0.815604	0.421	0.125	0	Epithelial cells	CYSTM1	up
PDIA3	0	0.812102	0.608	0.352	0	Epithelial cells	PDIA3	up
ATP1A1	0	0.808194	0.489	0.197	0	Epithelial cells	ATP1A1	up
YWHAE	0	0.804838	0.637	0.328	0	Epithelial cells	YWHAE	up
SLC26A4	0	0.79536	0.138	0.005	0	Epithelial cells	SLC26A4	up
KIF22	0	0.794736	0.323	0.065	0	Epithelial cells	KIF22	up
TCEA3	0	0.790423	0.233	0.016	0	Epithelial cells	TCEA3	up
PALLD	0	0.789322	0.251	0.054	0	Epithelial cells	PALLD	up
SLC12A8	0	0.788616	0.206	0.008	0	Epithelial cells	SLC12A8	up
GTF2I	0	0.788503	0.468	0.177	0	Epithelial cells	GTF2I	up
MGST3	0	0.786807	0.623	0.3	0	Epithelial cells	MGST3	up
EMP2	0	0.786159	0.271	0.044	0	Epithelial cells	EMP2	up
GPRC5C	0	0.781412	0.234	0.028	0	Epithelial cells	GPRC5C	up
S100A16	0	0.780748	0.26	0.033	0	Epithelial cells	S100A16	up
ST3GAL5	0	0.778841	0.304	0.058	0	Epithelial cells	ST3GAL5	up
LPCAT2	0	0.778718	0.338	0.086	0	Epithelial cells	LPCAT2	up
PAM	0	0.778495	0.294	0.045	0	Epithelial cells	PAM	up
SMIM4	0	0.777461	0.333	0.083	0	Epithelial cells	SMIM4	up
HHEX	0	0.777376	0.281	0.054	0	Epithelial cells	HHEX	up
DCBLD2	0	0.776642	0.231	0.02	0	Epithelial cells	DCBLD2	up
PDIA6	0	0.775172	0.562	0.29	0	Epithelial cells	PDIA6	up
SCNN1A	0	0.770733	0.194	0.007	0	Epithelial cells	SCNN1A	up
ZFP36L1	0	0.770606	0.71	0.463	0	Epithelial cells	ZFP36L1	up
PTPRF	0	0.768893	0.224	0.011	0	Epithelial cells	PTPRF	up
PNKD	0	0.767569	0.412	0.131	0	Epithelial cells	PNKD	up
ARHGAP29	0	0.767176	0.333	0.052	0	Epithelial cells	ARHGAP29	up
ZFAS1	0	0.766321	0.72	0.477	0	Epithelial cells	ZFAS1	up
MLLT4	0	0.765643	0.321	0.074	0	Epithelial cells	MLLT4	up
ALDH3A2	0	0.76391	0.292	0.053	0	Epithelial cells	ALDH3A2	up
DCSTAMP	0	0.762431	0.154	0.007	0	Epithelial cells	DCSTAMP	up
PCSK2	0	0.760985	0.153	0.005	0	Epithelial cells	PCSK2	up
DUOX2	0	0.760267	0.215	0.004	0	Epithelial cells	DUOX2	up
CFI	0	0.759394	0.201	0.021	0	Epithelial cells	CFI	up
ISCA2	0	0.753831	0.355	0.099	0	Epithelial cells	ISCA2	up
COL4A3BP	0	0.750668	0.322	0.079	0	Epithelial cells	COL4A3BP	up
RBM47	0	0.749974	0.289	0.057	0	Epithelial cells	RBM47	up
CAT	0	0.749617	0.372	0.135	0	Epithelial cells	CAT	up
ZNF431	0	0.747557	0.283	0.062	0	Epithelial cells	ZNF431	up
IGFN1	0	0.745974	0.121	0.021	0	Epithelial cells	IGFN1	up
RAB13	0	0.74449	0.338	0.084	0	Epithelial cells	RAB13	up
HOOK2	0	0.743627	0.249	0.033	0	Epithelial cells	HOOK2	up
CTNNB1	0	0.742553	0.459	0.223	0	Epithelial cells	CTNNB1	up
RBPMS	0	0.742257	0.272	0.031	0	Epithelial cells	RBPMS	up
PLXNB2	0	0.740874	0.269	0.047	0	Epithelial cells	PLXNB2	up
TOMM20	0	0.740709	0.593	0.32	0	Epithelial cells	TOMM20	up
PBX1	0	0.739838	0.251	0.016	0	Epithelial cells	PBX1	up
FOXE1	0	0.739074	0.198	0.006	0	Epithelial cells	FOXE1	up
FARP1	0	0.738617	0.255	0.035	0	Epithelial cells	FARP1	up
ADGRF1	0	0.737936	0.147	0.007	0	Epithelial cells	ADGRF1	up
PDIA4	0	0.736641	0.363	0.123	0	Epithelial cells	PDIA4	up
ECHDC2	0	0.735843	0.302	0.054	0	Epithelial cells	ECHDC2	up
TMEM205	0	0.73456	0.37	0.103	0	Epithelial cells	TMEM205	up
ARMCX2	0	0.731641	0.251	0.024	0	Epithelial cells	ARMCX2	up
GINM1	0	0.730425	0.363	0.105	0	Epithelial cells	GINM1	up
LGALS3BP	0	0.729797	0.359	0.1	0	Epithelial cells	LGALS3BP	up
PDCD4	0	0.729792	0.517	0.226	0	Epithelial cells	PDCD4	up
NFIA	0	0.729527	0.314	0.055	0	Epithelial cells	NFIA	up
EGFR	0	0.729229	0.214	0.011	0	Epithelial cells	EGFR	up
PPA1	0	0.728502	0.532	0.251	0	Epithelial cells	PPA1	up
ECI1	0	0.728241	0.279	0.052	0	Epithelial cells	ECI1	up
TCTN3	0	0.727142	0.215	0.043	0	Epithelial cells	TCTN3	up
FIS1	0	0.72616	0.552	0.283	0	Epithelial cells	FIS1	up
SNX1	0	0.726063	0.321	0.09	0	Epithelial cells	SNX1	up
RCN2	0	0.725484	0.423	0.151	0	Epithelial cells	RCN2	up
MTRNR2L12	0	0.72537	0.759	0.435	0	Epithelial cells	MTRNR2L12	up
C12orf49	0	0.72517	0.275	0.05	0	Epithelial cells	C12orf49	up
SLC39A10	0	0.724182	0.324	0.108	0	Epithelial cells	SLC39A10	up
MRPL40	0	0.719707	0.342	0.11	0	Epithelial cells	MRPL40	up
PON2	0	0.719176	0.31	0.07	0	Epithelial cells	PON2	up
GABRB2	0	0.7188	0.183	0.005	0	Epithelial cells	GABRB2	up
TRAK2	0	0.717078	0.26	0.047	0	Epithelial cells	TRAK2	up
PTTG1IP	0	0.716136	0.452	0.179	0	Epithelial cells	PTTG1IP	up
TMEM141	0	0.715219	0.357	0.106	0	Epithelial cells	TMEM141	up
MXRA8	0	0.714405	0.263	0.028	0	Epithelial cells	MXRA8	up
SELENBP1	0	0.709119	0.234	0.025	0	Epithelial cells	SELENBP1	up
ARL1	0	0.708923	0.365	0.111	0	Epithelial cells	ARL1	up
MUC21	0	0.708785	0.106	0.006	0	Epithelial cells	MUC21	up
CYR61	0	0.708663	0.202	0.04	0	Epithelial cells	CYR61	up
MYO6	0	0.702248	0.238	0.034	0	Epithelial cells	MYO6	up
SLC22A31	0	0.701989	0.186	0.005	0	Epithelial cells	SLC22A31	up
DDR1	0	0.700442	0.21	0.009	0	Epithelial cells	DDR1	up
TCERG1L	0	0.699903	0.188	0.006	0	Epithelial cells	TCERG1L	up
PRDX6	0	0.699594	0.558	0.289	0	Epithelial cells	PRDX6	up
DTX4	0	0.69865	0.197	0.009	0	Epithelial cells	DTX4	up
ATPIF1	0	0.69722	0.645	0.4	0	Epithelial cells	ATPIF1	up
MT-ND3	0	0.69604	0.926	0.908	0	Epithelial cells	MT-ND3	up
TMED3	0	0.694182	0.32	0.082	0	Epithelial cells	TMED3	up
CANX	0	0.688747	0.509	0.243	0	Epithelial cells	CANX	up
TUSC3	0	0.687348	0.234	0.015	0	Epithelial cells	TUSC3	up
ATP11A	0	0.685302	0.227	0.037	0	Epithelial cells	ATP11A	up
HIST1H2AC	0	0.684689	0.313	0.079	0	Epithelial cells	HIST1H2AC	up
MT-CO2	0	0.683827	0.983	0.959	0	Epithelial cells	MT-CO2	up
TMBIM6	0	0.683389	0.738	0.548	0	Epithelial cells	TMBIM6	up
GJA1	0	0.682941	0.237	0.022	0	Epithelial cells	GJA1	up
FOLR1	0	0.679032	0.15	0.004	0	Epithelial cells	FOLR1	up
IFI6	0	0.678252	0.523	0.293	0	Epithelial cells	IFI6	up
SH3BGRL2	0	0.676892	0.222	0.013	0	Epithelial cells	SH3BGRL2	up
CALR	0	0.675952	0.683	0.434	0	Epithelial cells	CALR	up
SCARB2	0	0.674971	0.326	0.093	0	Epithelial cells	SCARB2	up
SAT1	0	0.673968	0.928	0.623	0	Epithelial cells	SAT1	up
DOCK9	0	0.672601	0.254	0.032	0	Epithelial cells	DOCK9	up
C9orf3	0	0.672274	0.254	0.029	0	Epithelial cells	C9orf3	up
MALL	0	0.672209	0.204	0.014	0	Epithelial cells	MALL	up
PPP1R14C	0	0.671866	0.185	0.007	0	Epithelial cells	PPP1R14C	up
LRP2	0	0.671704	0.15	0.005	0	Epithelial cells	LRP2	up
TJP1	0	0.671704	0.255	0.036	0	Epithelial cells	TJP1	up
SORBS2	0	0.670548	0.184	0.018	0	Epithelial cells	SORBS2	up
HES1	0	0.670113	0.227	0.043	0	Epithelial cells	HES1	up
SLC26A4-AS1	0	0.670105	0.122	0.004	0	Epithelial cells	SLC26A4-AS1	up
NAV2	0	0.667207	0.188	0.012	0	Epithelial cells	NAV2	up
EPS8	0	0.66623	0.314	0.065	0	Epithelial cells	EPS8	up
TM7SF2	0	0.664799	0.22	0.016	0	Epithelial cells	TM7SF2	up
MACROD2	0	0.66364	0.156	0.009	0	Epithelial cells	MACROD2	up
RHOBTB3	0	0.662485	0.232	0.041	0	Epithelial cells	RHOBTB3	up
ATP8A1	0	0.662352	0.217	0.049	0	Epithelial cells	ATP8A1	up
SSPN	0	0.661419	0.223	0.033	0	Epithelial cells	SSPN	up
LAPTM4A	0	0.659041	0.631	0.353	0	Epithelial cells	LAPTM4A	up
NRP2	0	0.657952	0.275	0.072	0	Epithelial cells	NRP2	up
ITGAV	0	0.657577	0.254	0.06	0	Epithelial cells	ITGAV	up
GOLGA8A	0	0.657314	0.279	0.067	0	Epithelial cells	GOLGA8A	up
CNN3	0	0.657119	0.373	0.084	0	Epithelial cells	CNN3	up
PPL	0	0.656832	0.156	0.009	0	Epithelial cells	PPL	up
IFT57	0	0.653392	0.314	0.077	0	Epithelial cells	IFT57	up
PSD3	0	0.650453	0.199	0.022	0	Epithelial cells	PSD3	up
PHPT1	0	0.648732	0.527	0.264	0	Epithelial cells	PHPT1	up
NFIC	0	0.648555	0.303	0.083	0	Epithelial cells	NFIC	up
IGF2BP2	0	0.646604	0.197	0.013	0	Epithelial cells	IGF2BP2	up
SNRPN	0	0.644172	0.444	0.194	0	Epithelial cells	SNRPN	up
NUCKS1	0	0.642764	0.551	0.281	0	Epithelial cells	NUCKS1	up
MED13	0	0.642413	0.293	0.091	0	Epithelial cells	MED13	up
SH2D4A	0	0.641193	0.185	0.013	0	Epithelial cells	SH2D4A	up
SSR3	0	0.640748	0.492	0.279	0	Epithelial cells	SSR3	up
PPP1R9A	0	0.640385	0.175	0.01	0	Epithelial cells	PPP1R9A	up
CLIP4	0	0.640325	0.222	0.037	0	Epithelial cells	CLIP4	up
CMYA5	0	0.637203	0.178	0.009	0	Epithelial cells	CMYA5	up
PPDPF	0	0.636944	0.699	0.485	0	Epithelial cells	PPDPF	up
METTL7A	0	0.635721	0.262	0.061	0	Epithelial cells	METTL7A	up
BDH2	0	0.634772	0.268	0.055	0	Epithelial cells	BDH2	up
ATRAID	0	0.634768	0.484	0.23	0	Epithelial cells	ATRAID	up
CUTA	0	0.634014	0.61	0.365	0	Epithelial cells	CUTA	up
ATP6V1D	0	0.630471	0.352	0.123	0	Epithelial cells	ATP6V1D	up
HEBP1	0	0.628676	0.294	0.08	0	Epithelial cells	HEBP1	up
CRABP2	0	0.625136	0.141	0.014	0	Epithelial cells	CRABP2	up
MAP3K13	0	0.624194	0.347	0.117	0	Epithelial cells	MAP3K13	up
REEP5	0	0.623634	0.567	0.309	0	Epithelial cells	REEP5	up
MIF	0	0.622683	0.582	0.371	0	Epithelial cells	MIF	up
POLR2I	0	0.622605	0.418	0.166	0	Epithelial cells	POLR2I	up
PKP4	0	0.622092	0.201	0.018	0	Epithelial cells	PKP4	up
BSG	0	0.621741	0.545	0.285	0	Epithelial cells	BSG	up
FAM13A	0	0.620976	0.219	0.031	0	Epithelial cells	FAM13A	up
TMEM243	0	0.620458	0.422	0.188	0	Epithelial cells	TMEM243	up
VSIG2	0	0.619189	0.192	0.005	0	Epithelial cells	VSIG2	up
RPL24	0	0.618492	0.938	0.884	0	Epithelial cells	RPL24	up
APP	0	0.616463	0.413	0.116	0	Epithelial cells	APP	up
FTH1	0	0.612838	0.992	0.959	0	Epithelial cells	FTH1	up
MIR222HG	0	0.611654	0.174	0.027	0	Epithelial cells	MIR222HG	up
LINC00657	0	0.611347	0.389	0.152	0	Epithelial cells	LINC00657	up
SNX22	0	0.610812	0.175	0.013	0	Epithelial cells	SNX22	up
MT-ATP6	0	0.609525	0.947	0.899	0	Epithelial cells	MT-ATP6	up
MYL4	0	0.607977	0.14	0.004	0	Epithelial cells	MYL4	up
ERRFI1	0	0.607227	0.187	0.032	0	Epithelial cells	ERRFI1	up
SEC63	0	0.606397	0.334	0.107	0	Epithelial cells	SEC63	up
TSPAN6	0	0.604958	0.192	0.013	0	Epithelial cells	TSPAN6	up
DUSP5	0	0.60474	0.239	0.076	0	Epithelial cells	DUSP5	up
MYL6B	0	0.604494	0.258	0.054	0	Epithelial cells	MYL6B	up
CCL28	0	0.60034	0.133	0.027	0	Epithelial cells	CCL28	up
TWF1	0	0.600135	0.273	0.072	0	Epithelial cells	TWF1	up
FNDC1	0	0.599958	0.125	0.006	0	Epithelial cells	FNDC1	up
ERBB2	0	0.599951	0.175	0.008	0	Epithelial cells	ERBB2	up
RTN3	0	0.59791	0.367	0.145	0	Epithelial cells	RTN3	up
CRYBG3	0	0.597701	0.175	0.045	0	Epithelial cells	CRYBG3	up
PEG10	0	0.597447	0.109	0.011	0	Epithelial cells	PEG10	up
NCKAP1	0	0.596821	0.211	0.031	0	Epithelial cells	NCKAP1	up
SLC38A5	0	0.59582	0.179	0.018	0	Epithelial cells	SLC38A5	up
MYH14	0	0.595178	0.155	0.006	0	Epithelial cells	MYH14	up
ZDHHC2	0	0.595077	0.254	0.065	0	Epithelial cells	ZDHHC2	up
SLC16A9	0	0.594748	0.142	0.007	0	Epithelial cells	SLC16A9	up
PDE1A	0	0.594581	0.171	0.017	0	Epithelial cells	PDE1A	up
CD46	0	0.594077	0.446	0.221	0	Epithelial cells	CD46	up
HSPB1	0	0.592918	0.652	0.394	0	Epithelial cells	HSPB1	up
INADL	0	0.59284	0.2	0.024	0	Epithelial cells	INADL	up
BMP7	0	0.592098	0.153	0.008	0	Epithelial cells	BMP7	up
PPIB	0	0.591836	0.7	0.49	0	Epithelial cells	PPIB	up
INPP5J	0	0.589518	0.178	0.006	0	Epithelial cells	INPP5J	up
TCEAL4	0	0.588764	0.347	0.12	0	Epithelial cells	TCEAL4	up
KRTCAP3	0	0.58875	0.151	0.007	0	Epithelial cells	KRTCAP3	up
PDE4C	0	0.586826	0.126	0.007	0	Epithelial cells	PDE4C	up
WARS	0	0.585974	0.204	0.081	0	Epithelial cells	WARS	up
PHLDA3	0	0.585381	0.152	0.023	0	Epithelial cells	PHLDA3	up
PTPRM	0	0.584953	0.208	0.023	0	Epithelial cells	PTPRM	up
RHOU	0	0.584916	0.171	0.029	0	Epithelial cells	RHOU	up
CLN5	0	0.584288	0.277	0.071	0	Epithelial cells	CLN5	up
HSBP1L1	0	0.581581	0.196	0.025	0	Epithelial cells	HSBP1L1	up
EGR1	0	0.580658	0.405	0.185	0	Epithelial cells	EGR1	up
TKT	0	0.580419	0.421	0.193	0	Epithelial cells	TKT	up
TMEM245	0	0.580156	0.256	0.051	0	Epithelial cells	TMEM245	up
FNBP1L	0	0.579423	0.205	0.028	0	Epithelial cells	FNBP1L	up
CCNI	0	0.57887	0.688	0.539	0	Epithelial cells	CCNI	up
KLK11	0	0.578638	0.142	0.001	0	Epithelial cells	KLK11	up
GALNT3	0	0.578113	0.173	0.026	0	Epithelial cells	GALNT3	up
LINC01315	0	0.577975	0.169	0.005	0	Epithelial cells	LINC01315	up
ECE1	0	0.577601	0.252	0.054	0	Epithelial cells	ECE1	up
TMEM50B	0	0.577415	0.367	0.133	0	Epithelial cells	TMEM50B	up
YBX3	0	0.576658	0.36	0.144	0	Epithelial cells	YBX3	up
FAM20A	0	0.57627	0.156	0.01	0	Epithelial cells	FAM20A	up
ARHGAP5	0	0.575898	0.263	0.07	0	Epithelial cells	ARHGAP5	up
NME3	0	0.575385	0.439	0.195	0	Epithelial cells	NME3	up
ADGRG1	0	0.57534	0.263	0.065	0	Epithelial cells	ADGRG1	up
HDLBP	0	0.575069	0.294	0.107	0	Epithelial cells	HDLBP	up
AHCYL1	0	0.574448	0.276	0.08	0	Epithelial cells	AHCYL1	up
RRAS	0	0.573922	0.26	0.064	0	Epithelial cells	RRAS	up
KIF9	0	0.573897	0.201	0.018	0	Epithelial cells	KIF9	up
MAGEF1	0	0.571163	0.224	0.038	0	Epithelial cells	MAGEF1	up
SPATS2L	0	0.570615	0.367	0.141	0	Epithelial cells	SPATS2L	up
WASL	0	0.570403	0.239	0.056	0	Epithelial cells	WASL	up
PLCG2	0	0.569663	0.581	0.344	0	Epithelial cells	PLCG2	up
COPRS	0	0.568369	0.249	0.063	0	Epithelial cells	COPRS	up
MALAT1	0	0.567857	0.996	0.999	0	Epithelial cells	MALAT1	up
CAPS	0	0.567389	0.187	0.015	0	Epithelial cells	CAPS	up
MESDC2	0	0.565859	0.403	0.172	0	Epithelial cells	MESDC2	up
MT-ND5	0	0.564583	0.909	0.747	0	Epithelial cells	MT-ND5	up
DPM3	0	0.563902	0.372	0.138	0	Epithelial cells	DPM3	up
TMEM14B	0	0.563411	0.488	0.258	0	Epithelial cells	TMEM14B	up
GNG12	0	0.561602	0.207	0.024	0	Epithelial cells	GNG12	up
IFT22	0	0.561321	0.202	0.022	0	Epithelial cells	IFT22	up
TMEM9	0	0.560975	0.217	0.038	0	Epithelial cells	TMEM9	up
IGFBP4	0	0.560934	0.343	0.096	0	Epithelial cells	IGFBP4	up
TANC1	0	0.560139	0.157	0.017	0	Epithelial cells	TANC1	up
PAWR	0	0.559376	0.177	0.026	0	Epithelial cells	PAWR	up
MT-ND4	0	0.55844	0.972	0.936	0	Epithelial cells	MT-ND4	up
DCDC2	0	0.557969	0.158	0.005	0	Epithelial cells	DCDC2	up
RIC3	0	0.557323	0.253	0.048	0	Epithelial cells	RIC3	up
CYBRD1	0	0.557246	0.224	0.041	0	Epithelial cells	CYBRD1	up
C1orf115	0	0.556917	0.158	0.015	0	Epithelial cells	C1orf115	up
ECM1	0	0.554636	0.107	0.025	0	Epithelial cells	ECM1	up
ALKBH7	0	0.554368	0.377	0.169	0	Epithelial cells	ALKBH7	up
GALNT7	0	0.5532	0.218	0.042	0	Epithelial cells	GALNT7	up
PTPRS	0	0.551457	0.165	0.021	0	Epithelial cells	PTPRS	up
GOLGB1	0	0.550632	0.4	0.176	0	Epithelial cells	GOLGB1	up
SGMS2	0	0.550624	0.177	0.017	0	Epithelial cells	SGMS2	up
LIMCH1	0	0.549484	0.192	0.019	0	Epithelial cells	LIMCH1	up
ASAP2	0	0.549091	0.182	0.024	0	Epithelial cells	ASAP2	up
LRIG3	0	0.547779	0.155	0.008	0	Epithelial cells	LRIG3	up
MCFD2	0	0.546845	0.265	0.071	0	Epithelial cells	MCFD2	up
CFAP36	0	0.546304	0.245	0.055	0	Epithelial cells	CFAP36	up
RAB4A	0	0.546041	0.285	0.115	0	Epithelial cells	RAB4A	up
RGL3	0	0.546004	0.163	0.009	0	Epithelial cells	RGL3	up
MEGF9	0	0.545559	0.18	0.035	0	Epithelial cells	MEGF9	up
MGAT4B	0	0.544707	0.205	0.039	0	Epithelial cells	MGAT4B	up
DBP	0	0.544496	0.192	0.041	0	Epithelial cells	DBP	up
DST	0	0.544474	0.22	0.093	0	Epithelial cells	DST	up
DUOXA1	0	0.54383	0.169	0.005	0	Epithelial cells	DUOXA1	up
SLC20A2	0	0.542332	0.182	0.036	0	Epithelial cells	SLC20A2	up
SREBF1	0	0.541429	0.17	0.036	0	Epithelial cells	SREBF1	up
MT-CO1	0	0.541354	0.99	0.963	0	Epithelial cells	MT-CO1	up
LAMP2	0	0.540637	0.371	0.156	0	Epithelial cells	LAMP2	up
MAP3K1	0	0.539598	0.27	0.083	0	Epithelial cells	MAP3K1	up
KLHDC2	0	0.539238	0.291	0.09	0	Epithelial cells	KLHDC2	up
JUP	0	0.539027	0.155	0.02	0	Epithelial cells	JUP	up
ATP6AP2	0	0.537341	0.508	0.285	0	Epithelial cells	ATP6AP2	up
CAMTA1	0	0.537311	0.425	0.198	0	Epithelial cells	CAMTA1	up
CMTM8	0	0.536855	0.204	0.027	0	Epithelial cells	CMTM8	up
PLPP2	0	0.536804	0.143	0.007	0	Epithelial cells	PLPP2	up
TMEM14C	0	0.536712	0.489	0.24	0	Epithelial cells	TMEM14C	up
HINT1	0	0.536643	0.769	0.66	0	Epithelial cells	HINT1	up
C5orf42	0	0.536585	0.174	0.029	0	Epithelial cells	C5orf42	up
PRRG4	0	0.535178	0.156	0.028	0	Epithelial cells	PRRG4	up
MRPL14	0	0.534099	0.324	0.138	0	Epithelial cells	MRPL14	up
SMIM5	0	0.533297	0.13	0.008	0	Epithelial cells	SMIM5	up
ADIRF	0	0.532647	0.368	0.102	0	Epithelial cells	ADIRF	up
OCIAD1	0	0.531574	0.477	0.247	0	Epithelial cells	OCIAD1	up
ARL4D	0	0.531539	0.147	0.022	0	Epithelial cells	ARL4D	up
MTUS1	0	0.530836	0.249	0.053	0	Epithelial cells	MTUS1	up
SNX5	0	0.528557	0.346	0.141	0	Epithelial cells	SNX5	up
PLD3	0	0.527487	0.321	0.108	0	Epithelial cells	PLD3	up
ARMCX6	0	0.52605	0.239	0.08	0	Epithelial cells	ARMCX6	up
HYI	0	0.525124	0.222	0.044	0	Epithelial cells	HYI	up
SEC62	0	0.524724	0.617	0.401	0	Epithelial cells	SEC62	up
GSTM3	0	0.524576	0.142	0.038	0	Epithelial cells	GSTM3	up
GLCCI1	0	0.524506	0.244	0.058	0	Epithelial cells	GLCCI1	up
NFIB	0	0.523923	0.237	0.043	0	Epithelial cells	NFIB	up
QPCT	0	0.523423	0.178	0.045	0	Epithelial cells	QPCT	up
MORN2	0	0.522865	0.192	0.022	0	Epithelial cells	MORN2	up
MZT2B	0	0.522379	0.542	0.321	0	Epithelial cells	MZT2B	up
BORCS7	0	0.522329	0.314	0.109	0	Epithelial cells	BORCS7	up
TMEM54	0	0.52214	0.155	0.01	0	Epithelial cells	TMEM54	up
ABHD11	0	0.522069	0.173	0.03	0	Epithelial cells	ABHD11	up
PPP1R14B	0	0.521985	0.349	0.142	0	Epithelial cells	PPP1R14B	up
ZBED2	0	0.521603	0.165	0.018	0	Epithelial cells	ZBED2	up
ZNF714	0	0.521103	0.154	0.021	0	Epithelial cells	ZNF714	up
SKP1	0	0.52102	0.707	0.592	0	Epithelial cells	SKP1	up
CHID1	0	0.520886	0.273	0.075	0	Epithelial cells	CHID1	up
LTBP2	0	0.520482	0.163	0.014	0	Epithelial cells	LTBP2	up
ST13	0	0.520222	0.546	0.327	0	Epithelial cells	ST13	up
ACADVL	0	0.519991	0.352	0.148	0	Epithelial cells	ACADVL	up
TBL1XR1	0	0.519651	0.349	0.141	0	Epithelial cells	TBL1XR1	up
PFN2	0	0.519115	0.184	0.015	0	Epithelial cells	PFN2	up
AFAP1L2	0	0.519017	0.183	0.018	0	Epithelial cells	AFAP1L2	up
TMEM30B	0	0.518781	0.17	0.008	0	Epithelial cells	TMEM30B	up
PTTG1	0	0.5182	0.283	0.116	0	Epithelial cells	PTTG1	up
TMC4	0	0.518031	0.144	0.008	0	Epithelial cells	TMC4	up
MAGED1	0	0.517503	0.168	0.028	0	Epithelial cells	MAGED1	up
LSR	0	0.51698	0.191	0.031	0	Epithelial cells	LSR	up
ITGA2	0	0.516117	0.104	0.017	0	Epithelial cells	ITGA2	up
SEC11A	0	0.515674	0.559	0.34	0	Epithelial cells	SEC11A	up
HPN	0	0.515632	0.148	0.004	0	Epithelial cells	HPN	up
MRPS25	0	0.515603	0.244	0.071	0	Epithelial cells	MRPS25	up
EPHA4	0	0.51548	0.141	0.014	0	Epithelial cells	EPHA4	up
YIPF2	0	0.514162	0.199	0.044	0	Epithelial cells	YIPF2	up
METRN	0	0.513607	0.172	0.024	0	Epithelial cells	METRN	up
ADAMTS9	0	0.513086	0.153	0.01	0	Epithelial cells	ADAMTS9	up
COBLL1	0	0.510831	0.159	0.03	0	Epithelial cells	COBLL1	up
ACTG1	0	0.509798	0.94	0.82	0	Epithelial cells	ACTG1	up
ARRDC3	0	0.509202	0.414	0.201	0	Epithelial cells	ARRDC3	up
SCARA3	0	0.507253	0.123	0.005	0	Epithelial cells	SCARA3	up
ACBD3	0	0.506341	0.279	0.108	0	Epithelial cells	ACBD3	up
SLC25A37	0	0.50563	0.246	0.081	0	Epithelial cells	SLC25A37	up
IL6ST	0	0.50547	0.372	0.148	0	Epithelial cells	IL6ST	up
AIG1	0	0.50457	0.232	0.064	0	Epithelial cells	AIG1	up
ALCAM	0	0.504148	0.246	0.089	0	Epithelial cells	ALCAM	up
NIPAL3	0	0.503822	0.208	0.043	0	Epithelial cells	NIPAL3	up
EFEMP2	0	0.503749	0.197	0.025	0	Epithelial cells	EFEMP2	up
PRDX3	0	0.502649	0.368	0.167	0	Epithelial cells	PRDX3	up
B4GALT1	0	0.50253	0.343	0.186	0	Epithelial cells	B4GALT1	up
TEAD1	0	0.500525	0.143	0.015	0	Epithelial cells	TEAD1	up
MYL12B	0	0.500089	0.797	0.652	0	Epithelial cells	MYL12B	up
GALE	0	0.497953	0.161	0.022	0	Epithelial cells	GALE	up
SMARCA1	0	0.497835	0.173	0.017	0	Epithelial cells	SMARCA1	up
WBP5	0	0.49754	0.245	0.061	0	Epithelial cells	WBP5	up
ARG2	0	0.496502	0.141	0.011	0	Epithelial cells	ARG2	up
CRB3	0	0.494878	0.124	0.006	0	Epithelial cells	CRB3	up
PRICKLE1	0	0.494062	0.144	0.009	0	Epithelial cells	PRICKLE1	up
BCAP29	0	0.493062	0.304	0.12	0	Epithelial cells	BCAP29	up
PTPN13	0	0.492251	0.156	0.014	0	Epithelial cells	PTPN13	up
STX12	0	0.491593	0.291	0.103	0	Epithelial cells	STX12	up
LMBRD1	0	0.490541	0.326	0.123	0	Epithelial cells	LMBRD1	up
LRPAP1	0	0.489864	0.382	0.175	0	Epithelial cells	LRPAP1	up
HMGN3	0	0.489329	0.531	0.315	0	Epithelial cells	HMGN3	up
CDH6	0	0.488873	0.133	0.028	0	Epithelial cells	CDH6	up
CFAP97	0	0.488778	0.314	0.123	0	Epithelial cells	CFAP97	up
AGRN	0	0.488329	0.168	0.026	0	Epithelial cells	AGRN	up
PLCB4	0	0.488223	0.112	0.01	0	Epithelial cells	PLCB4	up
YAP1	0	0.487162	0.168	0.017	0	Epithelial cells	YAP1	up
CHD4	0	0.486994	0.335	0.148	0	Epithelial cells	CHD4	up
HSP90AB1	0	0.486004	0.864	0.668	0	Epithelial cells	HSP90AB1	up
ARPC1A	0	0.484879	0.281	0.096	0	Epithelial cells	ARPC1A	up
PPP2CB	0	0.484774	0.206	0.056	0	Epithelial cells	PPP2CB	up
CASC4	0	0.484149	0.253	0.087	0	Epithelial cells	CASC4	up
DDX17	0	0.483796	0.572	0.369	0	Epithelial cells	DDX17	up
LIPG	0	0.483468	0.131	0.002	0	Epithelial cells	LIPG	up
TMEM106B	0	0.483376	0.255	0.077	0	Epithelial cells	TMEM106B	up
BAG1	0	0.483331	0.313	0.144	0	Epithelial cells	BAG1	up
SCEL	0	0.48263	0.1	0.005	0	Epithelial cells	SCEL	up
GOLGA8B	0	0.482116	0.237	0.064	0	Epithelial cells	GOLGA8B	up
GOLGA4	0	0.482016	0.383	0.175	0	Epithelial cells	GOLGA4	up
USP54	0	0.481225	0.134	0.009	0	Epithelial cells	USP54	up
CRYGN	0	0.479046	0.146	0.003	0	Epithelial cells	CRYGN	up
TPMT	0	0.478279	0.254	0.075	0	Epithelial cells	TPMT	up
HMGN1	0	0.477979	0.683	0.524	0	Epithelial cells	HMGN1	up
SCOC	0	0.477809	0.283	0.098	0	Epithelial cells	SCOC	up
UBE2H	0	0.477683	0.26	0.088	0	Epithelial cells	UBE2H	up
KLK10	0	0.476749	0.113	0.003	0	Epithelial cells	KLK10	up
LCA5	0	0.476361	0.15	0.01	0	Epithelial cells	LCA5	up
SPCS1	0	0.476126	0.603	0.407	0	Epithelial cells	SPCS1	up
MT-CO3	0	0.475546	0.967	0.921	0	Epithelial cells	MT-CO3	up
RHOD	0	0.475312	0.14	0.007	0	Epithelial cells	RHOD	up
MYOF	0	0.474562	0.181	0.047	0	Epithelial cells	MYOF	up
HOOK3	0	0.474431	0.284	0.118	0	Epithelial cells	HOOK3	up
CSRP1	0	0.474347	0.285	0.095	0	Epithelial cells	CSRP1	up
NDUFA5	0	0.474043	0.429	0.213	0	Epithelial cells	NDUFA5	up
PRR15	0	0.473523	0.133	0.007	0	Epithelial cells	PRR15	up
MT-ATP8	0	0.472709	0.323	0.161	0	Epithelial cells	MT-ATP8	up
ATP13A4	0	0.472528	0.14	0.004	0	Epithelial cells	ATP13A4	up
GFPT1	0	0.472322	0.198	0.056	0	Epithelial cells	GFPT1	up
NT5E	0	0.472069	0.137	0.02	0	Epithelial cells	NT5E	up
SLC7A2	0	0.470468	0.146	0.013	0	Epithelial cells	SLC7A2	up
DEGS1	0	0.469971	0.32	0.154	0	Epithelial cells	DEGS1	up
HEBP2	0	0.469743	0.307	0.14	0	Epithelial cells	HEBP2	up
TRIB1	0	0.469716	0.239	0.075	0	Epithelial cells	TRIB1	up
CD47	0	0.468983	0.493	0.298	0	Epithelial cells	CD47	up
RBMS3	0	0.46684	0.168	0.021	0	Epithelial cells	RBMS3	up
PIGP	0	0.466673	0.284	0.097	0	Epithelial cells	PIGP	up
PRKCI	0	0.464865	0.161	0.03	0	Epithelial cells	PRKCI	up
MTHFD2L	0	0.463364	0.189	0.036	0	Epithelial cells	MTHFD2L	up
VEZT	0	0.463282	0.248	0.073	0	Epithelial cells	VEZT	up
XPR1	0	0.462312	0.136	0.027	0	Epithelial cells	XPR1	up
HMGA2	0	0.46227	0.125	0.003	0	Epithelial cells	HMGA2	up
ZNF667-AS1	0	0.461627	0.185	0.021	0	Epithelial cells	ZNF667-AS1	up
ECHS1	0	0.461373	0.319	0.145	0	Epithelial cells	ECHS1	up
WEE1	0	0.46087	0.165	0.036	0	Epithelial cells	WEE1	up
ALG5	0	0.460866	0.296	0.107	0	Epithelial cells	ALG5	up
IQCK	0	0.460486	0.16	0.012	0	Epithelial cells	IQCK	up
PCDH7	0	0.459981	0.129	0.004	0	Epithelial cells	PCDH7	up
HSBP1	0	0.459578	0.472	0.253	0	Epithelial cells	HSBP1	up
SIL1	0	0.458468	0.225	0.063	0	Epithelial cells	SIL1	up
TM9SF3	0	0.458409	0.357	0.165	0	Epithelial cells	TM9SF3	up
ST6GAL2	0	0.458288	0.131	0.003	0	Epithelial cells	ST6GAL2	up
RPN2	0	0.45816	0.404	0.205	0	Epithelial cells	RPN2	up
NDFIP1	0	0.458107	0.513	0.308	0	Epithelial cells	NDFIP1	up
SCD5	0	0.457241	0.141	0.01	0	Epithelial cells	SCD5	up
TUBB4B	0	0.457061	0.385	0.17	0	Epithelial cells	TUBB4B	up
NENF	0	0.456932	0.338	0.151	0	Epithelial cells	NENF	up
DYNC1LI2	0	0.456602	0.246	0.08	0	Epithelial cells	DYNC1LI2	up
RAB2A	0	0.454788	0.449	0.241	0	Epithelial cells	RAB2A	up
CNPY2	0	0.454637	0.34	0.153	0	Epithelial cells	CNPY2	up
MLEC	0	0.452981	0.317	0.136	0	Epithelial cells	MLEC	up
GADD45A	0	0.452657	0.25	0.106	0	Epithelial cells	GADD45A	up
RPS27L	0	0.452601	0.623	0.434	0	Epithelial cells	RPS27L	up
LAMA5	0	0.452577	0.14	0.015	0	Epithelial cells	LAMA5	up
YIF1A	0	0.45186	0.299	0.121	0	Epithelial cells	YIF1A	up
ISCU	0	0.451591	0.521	0.323	0	Epithelial cells	ISCU	up
ARL3	0	0.451583	0.255	0.077	0	Epithelial cells	ARL3	up
MFGE8	0	0.450976	0.229	0.062	0	Epithelial cells	MFGE8	up
ITGA9	0	0.450692	0.134	0.01	0	Epithelial cells	ITGA9	up
TSPAN13	0	0.450591	0.206	0.039	0	Epithelial cells	TSPAN13	up
RAB11B	0	0.450063	0.346	0.152	0	Epithelial cells	RAB11B	up
INHBB	0	0.449597	0.138	0.009	0	Epithelial cells	INHBB	up
TMEM30A	0	0.449042	0.323	0.136	0	Epithelial cells	TMEM30A	up
DNAJC21	0	0.448936	0.269	0.126	0	Epithelial cells	DNAJC21	up
LTBP4	0	0.448901	0.186	0.041	0	Epithelial cells	LTBP4	up
TRIM2	0	0.448704	0.14	0.013	0	Epithelial cells	TRIM2	up
HSD17B4	0	0.448306	0.222	0.069	0	Epithelial cells	HSD17B4	up
NRIP1	0	0.447757	0.201	0.066	0	Epithelial cells	NRIP1	up
MAP2	0	0.44677	0.145	0.015	0	Epithelial cells	MAP2	up
CTBP2	0	0.446478	0.205	0.058	0	Epithelial cells	CTBP2	up
MRPL43	0	0.446389	0.328	0.145	0	Epithelial cells	MRPL43	up
PARD6B	0	0.446014	0.139	0.011	0	Epithelial cells	PARD6B	up
ZNF430	0	0.445665	0.219	0.068	0	Epithelial cells	ZNF430	up
CALU	0	0.445505	0.273	0.098	0	Epithelial cells	CALU	up
DUOX1	0	0.444882	0.136	0.008	0	Epithelial cells	DUOX1	up
PLXNB1	0	0.444814	0.121	0.005	0	Epithelial cells	PLXNB1	up
NDUFS5	0	0.444683	0.633	0.464	0	Epithelial cells	NDUFS5	up
WDR34	0	0.44436	0.155	0.017	0	Epithelial cells	WDR34	up
ITPR3	0	0.443226	0.125	0.021	0	Epithelial cells	ITPR3	up
AFF1	0	0.443085	0.232	0.07	0	Epithelial cells	AFF1	up
FBXO7	0	0.443035	0.302	0.118	0	Epithelial cells	FBXO7	up
FAM114A1	0	0.442606	0.135	0.03	0	Epithelial cells	FAM114A1	up
ZNRF1	0	0.441984	0.19	0.036	0	Epithelial cells	ZNRF1	up
LRP4	0	0.441334	0.136	0.004	0	Epithelial cells	LRP4	up
SAMD12	0	0.441318	0.134	0.01	0	Epithelial cells	SAMD12	up
AC079630.2	0	0.440703	0.135	0.002	0	Epithelial cells	AC079630.2	up
EPS8L2	0	0.439512	0.149	0.025	0	Epithelial cells	EPS8L2	up
ZMAT3	0	0.439424	0.205	0.061	0	Epithelial cells	ZMAT3	up
TRIP11	0	0.439367	0.263	0.099	0	Epithelial cells	TRIP11	up
UNC50	0	0.438853	0.269	0.102	0	Epithelial cells	UNC50	up
ITSN2	0	0.438649	0.335	0.163	0	Epithelial cells	ITSN2	up
CERS4	0	0.437553	0.193	0.032	0	Epithelial cells	CERS4	up
SYNE2	0	0.437208	0.476	0.241	0	Epithelial cells	SYNE2	up
LARP6	0	0.435843	0.141	0.01	0	Epithelial cells	LARP6	up
GSTO2	0	0.435506	0.133	0.006	0	Epithelial cells	GSTO2	up
MRPS23	0	0.434362	0.262	0.102	0	Epithelial cells	MRPS23	up
TENM1	0	0.433291	0.136	0.005	0	Epithelial cells	TENM1	up
DPY30	0	0.432984	0.369	0.176	0	Epithelial cells	DPY30	up
SCCPDH	0	0.432919	0.186	0.053	0	Epithelial cells	SCCPDH	up
CTNNA1	0	0.43209	0.253	0.093	0	Epithelial cells	CTNNA1	up
SEC31A	0	0.43157	0.273	0.124	0	Epithelial cells	SEC31A	up
NDUFAB1	0	0.43032	0.447	0.258	0	Epithelial cells	NDUFAB1	up
ABHD14A	0	0.430142	0.239	0.068	0	Epithelial cells	ABHD14A	up
SLC7A8	0	0.428941	0.123	0.015	0	Epithelial cells	SLC7A8	up
ADK	0	0.428798	0.211	0.064	0	Epithelial cells	ADK	up
FZD6	0	0.428618	0.143	0.012	0	Epithelial cells	FZD6	up
POR	0	0.428555	0.202	0.064	0	Epithelial cells	POR	up
CXXC5	0	0.428409	0.187	0.045	0	Epithelial cells	CXXC5	up
LEPROT	0	0.428131	0.363	0.165	0	Epithelial cells	LEPROT	up
ZNF770	0	0.428005	0.204	0.055	0	Epithelial cells	ZNF770	up
AKAP9	0	0.427668	0.47	0.251	0	Epithelial cells	AKAP9	up
PPFIBP1	0	0.426877	0.215	0.044	0	Epithelial cells	PPFIBP1	up
CDS1	0	0.426815	0.113	0.005	0	Epithelial cells	CDS1	up
REEP3	0	0.426469	0.277	0.103	0	Epithelial cells	REEP3	up
DDRGK1	0	0.426454	0.294	0.115	0	Epithelial cells	DDRGK1	up
SYPL1	0	0.426452	0.393	0.189	0	Epithelial cells	SYPL1	up
TJP2	0	0.426398	0.148	0.019	0	Epithelial cells	TJP2	up
LDOC1	0	0.426241	0.149	0.015	0	Epithelial cells	LDOC1	up
EID1	0	0.426189	0.585	0.383	0	Epithelial cells	EID1	up
RNF144B	0	0.426008	0.18	0.057	0	Epithelial cells	RNF144B	up
RAB18	0	0.425536	0.316	0.14	0	Epithelial cells	RAB18	up
SHROOM3	0	0.425379	0.114	0.004	0	Epithelial cells	SHROOM3	up
SLC44A1	0	0.424624	0.235	0.072	0	Epithelial cells	SLC44A1	up
DDT	0	0.42444	0.462	0.277	0	Epithelial cells	DDT	up
TMEM37	0	0.423957	0.14	0.014	0	Epithelial cells	TMEM37	up
DDAH2	0	0.423162	0.289	0.13	0	Epithelial cells	DDAH2	up
ANXA4	0	0.422854	0.264	0.1	0	Epithelial cells	ANXA4	up
TAF10	0	0.422825	0.332	0.166	0	Epithelial cells	TAF10	up
INTU	0	0.422441	0.14	0.013	0	Epithelial cells	INTU	up
LUC7L3	0	0.422284	0.43	0.227	0	Epithelial cells	LUC7L3	up
LMO4	0	0.42221	0.31	0.13	0	Epithelial cells	LMO4	up
ARHGEF12	0	0.42194	0.212	0.059	0	Epithelial cells	ARHGEF12	up
C7orf55	0	0.421789	0.261	0.088	0	Epithelial cells	C7orf55	up
ASS1	0	0.421752	0.134	0.007	0	Epithelial cells	ASS1	up
PLEKHA5	0	0.42138	0.16	0.034	0	Epithelial cells	PLEKHA5	up
CTNND1	0	0.420524	0.217	0.078	0	Epithelial cells	CTNND1	up
SERGEF	0	0.41972	0.176	0.039	0	Epithelial cells	SERGEF	up
HCFC1R1	0	0.419631	0.239	0.082	0	Epithelial cells	HCFC1R1	up
ENTPD1	0	0.419386	0.223	0.092	0	Epithelial cells	ENTPD1	up
MORF4L2	0	0.418088	0.35	0.157	0	Epithelial cells	MORF4L2	up
TSPAN4	0	0.417159	0.212	0.061	0	Epithelial cells	TSPAN4	up
KTN1	0	0.416782	0.545	0.332	0	Epithelial cells	KTN1	up
CCPG1	0	0.416618	0.308	0.134	0	Epithelial cells	CCPG1	up
DAD1	0	0.413273	0.59	0.414	0	Epithelial cells	DAD1	up
ROMO1	0	0.413225	0.459	0.273	0	Epithelial cells	ROMO1	up
TMEM208	0	0.413177	0.318	0.147	0	Epithelial cells	TMEM208	up
FAM162A	0	0.413068	0.325	0.157	0	Epithelial cells	FAM162A	up
UPF3A	0	0.412864	0.282	0.109	0	Epithelial cells	UPF3A	up
BAZ2B	0	0.412685	0.288	0.121	0	Epithelial cells	BAZ2B	up
NET1	0	0.412457	0.119	0.031	0	Epithelial cells	NET1	up
SLC25A4	0	0.412154	0.171	0.038	0	Epithelial cells	SLC25A4	up
TRIP6	0	0.412083	0.162	0.034	0	Epithelial cells	TRIP6	up
TATDN1	0	0.411399	0.273	0.111	0	Epithelial cells	TATDN1	up
H2AFJ	0	0.411075	0.35	0.17	0	Epithelial cells	H2AFJ	up
RYK	0	0.410852	0.196	0.051	0	Epithelial cells	RYK	up
CLPTM1L	0	0.409966	0.213	0.069	0	Epithelial cells	CLPTM1L	up
IVD	0	0.409594	0.186	0.058	0	Epithelial cells	IVD	up
CROT	0	0.409584	0.154	0.028	0	Epithelial cells	CROT	up
OBSL1	0	0.409363	0.126	0.007	0	Epithelial cells	OBSL1	up
SLC25A23	0	0.408847	0.122	0.012	0	Epithelial cells	SLC25A23	up
BASP1	0	0.408495	0.27	0.106	0	Epithelial cells	BASP1	up
ENPP5	0	0.408394	0.124	0.006	0	Epithelial cells	ENPP5	up
ENAH	0	0.408273	0.13	0.023	0	Epithelial cells	ENAH	up
TM7SF3	0	0.408214	0.197	0.064	0	Epithelial cells	TM7SF3	up
ABI2	0	0.408128	0.218	0.064	0	Epithelial cells	ABI2	up
RIN2	0	0.408076	0.159	0.047	0	Epithelial cells	RIN2	up
PTK2	0	0.407882	0.177	0.043	0	Epithelial cells	PTK2	up
ANK3	0	0.407803	0.144	0.017	0	Epithelial cells	ANK3	up
ST14	0	0.407453	0.116	0.028	0	Epithelial cells	ST14	up
CERS6	0	0.40627	0.184	0.047	0	Epithelial cells	CERS6	up
PARP14	0	0.406211	0.37	0.186	0	Epithelial cells	PARP14	up
EPB41L5	0	0.406155	0.117	0.009	0	Epithelial cells	EPB41L5	up
CHMP2A	0	0.405812	0.413	0.231	0	Epithelial cells	CHMP2A	up
CD320	0	0.405792	0.234	0.075	0	Epithelial cells	CD320	up
ZC2HC1A	0	0.405521	0.198	0.048	0	Epithelial cells	ZC2HC1A	up
CETN2	0	0.405214	0.205	0.051	0	Epithelial cells	CETN2	up
DAP	0	0.40516	0.229	0.076	0	Epithelial cells	DAP	up
TMED2	0	0.404598	0.43	0.255	0	Epithelial cells	TMED2	up
RAPGEF3	0	0.404537	0.125	0.012	0	Epithelial cells	RAPGEF3	up
F11R	0	0.404193	0.147	0.026	0	Epithelial cells	F11R	up
IQCA1	0	0.404086	0.125	0.003	0	Epithelial cells	IQCA1	up
PRSS8	0	0.40382	0.1	0.004	0	Epithelial cells	PRSS8	up
TMED10	0	0.403768	0.428	0.234	0	Epithelial cells	TMED10	up
CMTM4	0	0.403757	0.114	0.006	0	Epithelial cells	CMTM4	up
P4HTM	0	0.403688	0.205	0.049	0	Epithelial cells	P4HTM	up
MAL	0	0.403308	0.171	0.047	0	Epithelial cells	MAL	up
SMYD3	0	0.40319	0.129	0.035	0	Epithelial cells	SMYD3	up
UBXN4	0	0.40304	0.507	0.297	0	Epithelial cells	UBXN4	up
WDR86	0	0.402044	0.131	0.005	0	Epithelial cells	WDR86	up
MACROD1	0	0.401723	0.127	0.013	0	Epithelial cells	MACROD1	up
TP53BP2	0	0.40108	0.148	0.046	0	Epithelial cells	TP53BP2	up
SDC1	0	0.400805	0.107	0.007	0	Epithelial cells	SDC1	up
STRADB	0	0.399919	0.148	0.023	0	Epithelial cells	STRADB	up
GIPC1	0	0.39978	0.155	0.046	0	Epithelial cells	GIPC1	up
NRCAM	0	0.399327	0.119	0.003	0	Epithelial cells	NRCAM	up
SCPEP1	0	0.398965	0.27	0.109	0	Epithelial cells	SCPEP1	up
ACAA2	0	0.398922	0.24	0.097	0	Epithelial cells	ACAA2	up
COX14	0	0.398748	0.413	0.237	0	Epithelial cells	COX14	up
RP4-568C11.4	0	0.398654	0.113	0.003	0	Epithelial cells	RP4-568C11.4	up
PARP4	0	0.398295	0.205	0.078	0	Epithelial cells	PARP4	up
ARL13B	0	0.397639	0.135	0.033	0	Epithelial cells	ARL13B	up
PTS	0	0.397351	0.221	0.071	0	Epithelial cells	PTS	up
DMD	0	0.396471	0.135	0.011	0	Epithelial cells	DMD	up
VPS13D	0	0.396288	0.175	0.04	0	Epithelial cells	VPS13D	up
STUB1	0	0.396049	0.351	0.172	0	Epithelial cells	STUB1	up
MPG	0	0.395899	0.291	0.122	0	Epithelial cells	MPG	up
CALM2	0	0.39573	0.761	0.658	0	Epithelial cells	CALM2	up
ERLEC1	0	0.394806	0.289	0.127	0	Epithelial cells	ERLEC1	up
GXYLT2	0	0.393807	0.126	0.005	0	Epithelial cells	GXYLT2	up
EFHC1	0	0.393733	0.163	0.028	0	Epithelial cells	EFHC1	up
CHST2	0	0.393525	0.155	0.03	0	Epithelial cells	CHST2	up
MARVELD2	0	0.393357	0.111	0.004	0	Epithelial cells	MARVELD2	up
HOOK1	0	0.393346	0.12	0.008	0	Epithelial cells	HOOK1	up
CHMP5	0	0.393077	0.423	0.232	0	Epithelial cells	CHMP5	up
FAM129B	0	0.392367	0.13	0.026	0	Epithelial cells	FAM129B	up
VCL	0	0.391953	0.214	0.067	0	Epithelial cells	VCL	up
TFG	0	0.391663	0.236	0.092	0	Epithelial cells	TFG	up
TALDO1	0	0.391468	0.401	0.229	0	Epithelial cells	TALDO1	up
COPB2	0	0.391418	0.234	0.099	0	Epithelial cells	COPB2	up
BSPRY	0	0.390858	0.101	0.006	0	Epithelial cells	BSPRY	up
ESRP1	0	0.389446	0.108	0.004	0	Epithelial cells	ESRP1	up
MSRB2	0	0.389439	0.214	0.081	0	Epithelial cells	MSRB2	up
C1orf122	0	0.389203	0.254	0.106	0	Epithelial cells	C1orf122	up
HIBCH	0	0.38711	0.195	0.054	0	Epithelial cells	HIBCH	up
NR2F6	0	0.386787	0.121	0.012	0	Epithelial cells	NR2F6	up
MRPL57	0	0.386786	0.44	0.254	0	Epithelial cells	MRPL57	up
SAMD4A	0	0.385974	0.138	0.018	0	Epithelial cells	SAMD4A	up
PDGFRL	0	0.385671	0.126	0.012	0	Epithelial cells	PDGFRL	up
AKAP1	0	0.385394	0.133	0.025	0	Epithelial cells	AKAP1	up
ARNTL	0	0.385387	0.157	0.037	0	Epithelial cells	ARNTL	up
RHEB	0	0.384662	0.429	0.241	0	Epithelial cells	RHEB	up
GABARAPL2	0	0.3846	0.528	0.346	0	Epithelial cells	GABARAPL2	up
CAND1	0	0.384405	0.242	0.103	0	Epithelial cells	CAND1	up
ADI1	0	0.384096	0.283	0.13	0	Epithelial cells	ADI1	up
AHCY	0	0.383896	0.166	0.042	0	Epithelial cells	AHCY	up
RBBP8	0	0.383625	0.139	0.032	0	Epithelial cells	RBBP8	up
STAU1	0	0.383326	0.291	0.136	0	Epithelial cells	STAU1	up
ZFHX3	0	0.382431	0.202	0.067	0	Epithelial cells	ZFHX3	up
PIN4	0	0.382109	0.306	0.127	0	Epithelial cells	PIN4	up
FRMD4B	0	0.382039	0.277	0.117	0	Epithelial cells	FRMD4B	up
FGFRL1	0	0.381602	0.111	0.007	0	Epithelial cells	FGFRL1	up
CREB3L2	0	0.381199	0.205	0.08	0	Epithelial cells	CREB3L2	up
TMEM125	0	0.381016	0.11	0.003	0	Epithelial cells	TMEM125	up
NEBL	0	0.380833	0.114	0.01	0	Epithelial cells	NEBL	up
APMAP	0	0.379688	0.31	0.139	0	Epithelial cells	APMAP	up
MAPK13	0	0.379145	0.153	0.039	0	Epithelial cells	MAPK13	up
MBTPS1	0	0.379109	0.233	0.083	0	Epithelial cells	MBTPS1	up
PARM1	0	0.378362	0.125	0.019	0	Epithelial cells	PARM1	up
ALDH9A1	0	0.378313	0.24	0.093	0	Epithelial cells	ALDH9A1	up
SCG5	0	0.378198	0.114	0.003	0	Epithelial cells	SCG5	up
PSMG1	0	0.378021	0.199	0.06	0	Epithelial cells	PSMG1	up
SRSF9	0	0.377445	0.49	0.292	0	Epithelial cells	SRSF9	up
GCLM	0	0.377082	0.181	0.052	0	Epithelial cells	GCLM	up
CALD1	0	0.376732	0.464	0.118	0	Epithelial cells	CALD1	up
ST5	0	0.376251	0.117	0.015	0	Epithelial cells	ST5	up
ENDOD1	0	0.375893	0.152	0.031	0	Epithelial cells	ENDOD1	up
GNA11	0	0.375867	0.123	0.02	0	Epithelial cells	GNA11	up
KDELR3	0	0.374387	0.123	0.015	0	Epithelial cells	KDELR3	up
SIAE	0	0.374349	0.111	0.008	0	Epithelial cells	SIAE	up
FBXO21	0	0.374325	0.21	0.064	0	Epithelial cells	FBXO21	up
PRDX4	0	0.374108	0.298	0.13	0	Epithelial cells	PRDX4	up
TPD52	0	0.37313	0.239	0.086	0	Epithelial cells	TPD52	up
PTMS	0	0.372739	0.505	0.268	0	Epithelial cells	PTMS	up
MRPS26	0	0.371843	0.271	0.112	0	Epithelial cells	MRPS26	up
ZFYVE21	0	0.371147	0.196	0.057	0	Epithelial cells	ZFYVE21	up
HIPK2	0	0.370751	0.173	0.052	0	Epithelial cells	HIPK2	up
RUFY3	0	0.370561	0.164	0.044	0	Epithelial cells	RUFY3	up
RAD23B	0	0.369885	0.239	0.09	0	Epithelial cells	RAD23B	up
EFR3A	0	0.369867	0.244	0.102	0	Epithelial cells	EFR3A	up
TCEAL3	0	0.369351	0.202	0.065	0	Epithelial cells	TCEAL3	up
MBOAT2	0	0.369186	0.106	0.011	0	Epithelial cells	MBOAT2	up
NID2	0	0.368266	0.12	0.013	0	Epithelial cells	NID2	up
TMEM18	0	0.367609	0.203	0.068	0	Epithelial cells	TMEM18	up
PSMB5	0	0.367604	0.283	0.13	0	Epithelial cells	PSMB5	up
TRIOBP	0	0.366863	0.164	0.051	0	Epithelial cells	TRIOBP	up
MRPL51	0	0.366772	0.442	0.261	0	Epithelial cells	MRPL51	up
HDDC2	0	0.366385	0.265	0.106	0	Epithelial cells	HDDC2	up
SYCE1L	0	0.365539	0.141	0.024	0	Epithelial cells	SYCE1L	up
ACTN4	0	0.365429	0.407	0.209	0	Epithelial cells	ACTN4	up
RAB27A	0	0.364594	0.29	0.119	0	Epithelial cells	RAB27A	up
VASN	0	0.364497	0.108	0.012	0	Epithelial cells	VASN	up
EPHX1	0	0.363214	0.194	0.062	0	Epithelial cells	EPHX1	up
ARF4	0	0.363176	0.424	0.239	0	Epithelial cells	ARF4	up
HSD17B12	0	0.362533	0.234	0.1	0	Epithelial cells	HSD17B12	up
LAMC1	0	0.362079	0.147	0.031	0	Epithelial cells	LAMC1	up
FAM213A	0	0.361968	0.207	0.059	0	Epithelial cells	FAM213A	up
VEGFC	0	0.36147	0.112	0.009	0	Epithelial cells	VEGFC	up
ENOSF1	0	0.361143	0.165	0.037	0	Epithelial cells	ENOSF1	up
BCL7A	0	0.360991	0.124	0.017	0	Epithelial cells	BCL7A	up
PPCS	0	0.360923	0.313	0.159	0	Epithelial cells	PPCS	up
METTL9	0	0.360407	0.356	0.186	0	Epithelial cells	METTL9	up
BCL7C	0	0.360123	0.248	0.104	0	Epithelial cells	BCL7C	up
AC079630.4	0	0.359774	0.112	0.006	0	Epithelial cells	AC079630.4	up
FAM229B	0	0.359654	0.137	0.02	0	Epithelial cells	FAM229B	up
SPATS2	0	0.359282	0.161	0.038	0	Epithelial cells	SPATS2	up
FZD1	0	0.358961	0.104	0.017	0	Epithelial cells	FZD1	up
CCND2	0	0.358736	0.421	0.207	0	Epithelial cells	CCND2	up
ADGRF5	0	0.357991	0.17	0.043	0	Epithelial cells	ADGRF5	up
IGF2R	0	0.357529	0.22	0.089	0	Epithelial cells	IGF2R	up
BNIP3	0	0.357176	0.172	0.056	0	Epithelial cells	BNIP3	up
CCDC47	0	0.356846	0.272	0.13	0	Epithelial cells	CCDC47	up
KCNQ1OT1	0	0.356772	0.135	0.036	0	Epithelial cells	KCNQ1OT1	up
PGRMC2	0	0.356503	0.186	0.058	0	Epithelial cells	PGRMC2	up
CLTC	0	0.355624	0.292	0.146	0	Epithelial cells	CLTC	up
FCHO2	0	0.354689	0.159	0.054	0	Epithelial cells	FCHO2	up
TSPAN31	0	0.354581	0.206	0.067	0	Epithelial cells	TSPAN31	up
KIAA1671	0	0.354306	0.118	0.015	0	Epithelial cells	KIAA1671	up
C7orf50	0	0.354284	0.296	0.132	0	Epithelial cells	C7orf50	up
IL1R1	0	0.353426	0.133	0.041	0	Epithelial cells	IL1R1	up
RRM2B	0	0.353404	0.149	0.046	0	Epithelial cells	RRM2B	up
HECTD1	0	0.353255	0.246	0.108	0	Epithelial cells	HECTD1	up
SLC39A6	0	0.353006	0.173	0.055	0	Epithelial cells	SLC39A6	up
PABPN1	0	0.352657	0.283	0.135	0	Epithelial cells	PABPN1	up
EEF1A1	0	0.352242	0.995	0.984	0	Epithelial cells	EEF1A1	up
LINC00958	0	0.351043	0.104	0.003	0	Epithelial cells	LINC00958	up
EMC10	0	0.350871	0.28	0.129	0	Epithelial cells	EMC10	up
SASH1	0	0.350798	0.113	0.025	0	Epithelial cells	SASH1	up
OGFOD3	0	0.350284	0.16	0.043	0	Epithelial cells	OGFOD3	up
LMNA	0	0.34995	0.534	0.253	0	Epithelial cells	LMNA	up
CTD-2008P7.9	0	0.348848	0.107	0.003	0	Epithelial cells	CTD-2008P7.9	up
HIGD1A	0	0.348028	0.293	0.142	0	Epithelial cells	HIGD1A	up
NDUFAF3	0	0.3479	0.377	0.204	0	Epithelial cells	NDUFAF3	up
PECR	0	0.347011	0.125	0.025	0	Epithelial cells	PECR	up
ABHD12	0	0.346933	0.181	0.061	0	Epithelial cells	ABHD12	up
NEDD4L	0	0.346918	0.106	0.015	0	Epithelial cells	NEDD4L	up
EBPL	0	0.346236	0.233	0.091	0	Epithelial cells	EBPL	up
ZFAND6	0	0.345778	0.347	0.181	0	Epithelial cells	ZFAND6	up
YIPF3	0	0.345605	0.248	0.102	0	Epithelial cells	YIPF3	up
FNDC3A	0	0.345559	0.21	0.079	0	Epithelial cells	FNDC3A	up
SWI5	0	0.345198	0.172	0.043	0	Epithelial cells	SWI5	up
TIPARP	0	0.344808	0.208	0.083	0	Epithelial cells	TIPARP	up
ALDH1A1	0	0.344316	0.135	0.026	0	Epithelial cells	ALDH1A1	up
ZSCAN18	0	0.343844	0.153	0.035	0	Epithelial cells	ZSCAN18	up
EPN2	0	0.34291	0.145	0.035	0	Epithelial cells	EPN2	up
DUOXA2	0	0.341513	0.101	0.001	0	Epithelial cells	DUOXA2	up
ZNF680	0	0.341501	0.146	0.03	0	Epithelial cells	ZNF680	up
TSEN34	0	0.341458	0.205	0.076	0	Epithelial cells	TSEN34	up
ZRANB2	0	0.341158	0.338	0.178	0	Epithelial cells	ZRANB2	up
P4HA2	0	0.340972	0.109	0.012	0	Epithelial cells	P4HA2	up
WDR6	0	0.340907	0.176	0.054	0	Epithelial cells	WDR6	up
ALDH7A1	0	0.34067	0.106	0.016	0	Epithelial cells	ALDH7A1	up
ST3GAL1	0	0.340669	0.223	0.079	0	Epithelial cells	ST3GAL1	up
PJA2	0	0.338323	0.382	0.209	0	Epithelial cells	PJA2	up
CD109	0	0.338129	0.143	0.031	0	Epithelial cells	CD109	up
MRPS36	0	0.337986	0.329	0.168	0	Epithelial cells	MRPS36	up
NINJ1	0	0.337863	0.279	0.124	0	Epithelial cells	NINJ1	up
SPOCK1	0	0.337751	0.101	0.004	0	Epithelial cells	SPOCK1	up
PLA2G12A	0	0.337591	0.148	0.042	0	Epithelial cells	PLA2G12A	up
MYO1C	0	0.336581	0.149	0.05	0	Epithelial cells	MYO1C	up
RNPC3	0	0.336047	0.158	0.05	0	Epithelial cells	RNPC3	up
KAT6B	0	0.335587	0.213	0.077	0	Epithelial cells	KAT6B	up
CTXN1	0	0.335483	0.102	0.002	0	Epithelial cells	CTXN1	up
PER3	0	0.335382	0.125	0.031	0	Epithelial cells	PER3	up
ETV1	0	0.335367	0.114	0.022	0	Epithelial cells	ETV1	up
FLNB	0	0.33501	0.12	0.023	0	Epithelial cells	FLNB	up
UBE2E3	0	0.334906	0.273	0.117	0	Epithelial cells	UBE2E3	up
SLIT3	0	0.334306	0.111	0.007	0	Epithelial cells	SLIT3	up
ODC1	0	0.33427	0.323	0.145	0	Epithelial cells	ODC1	up
BOD1	0	0.334245	0.163	0.047	0	Epithelial cells	BOD1	up
NFIX	0	0.333976	0.124	0.013	0	Epithelial cells	NFIX	up
PBX3	0	0.333896	0.157	0.039	0	Epithelial cells	PBX3	up
DDAH1	0	0.333466	0.104	0.006	0	Epithelial cells	DDAH1	up
BEND7	0	0.333161	0.107	0.017	0	Epithelial cells	BEND7	up
RAPH1	0	0.333121	0.119	0.033	0	Epithelial cells	RAPH1	up
GPX8	0	0.332834	0.109	0.018	0	Epithelial cells	GPX8	up
TIMM13	0	0.332657	0.319	0.161	0	Epithelial cells	TIMM13	up
GALNT12	0	0.332387	0.107	0.009	0	Epithelial cells	GALNT12	up
CLIP1	0	0.332338	0.229	0.1	0	Epithelial cells	CLIP1	up
ZNF593	0	0.331887	0.191	0.07	0	Epithelial cells	ZNF593	up
VSTM4	0	0.331185	0.131	0.013	0	Epithelial cells	VSTM4	up
SLC48A1	0	0.33109	0.127	0.022	0	Epithelial cells	SLC48A1	up
CHD9	0	0.330515	0.361	0.189	0	Epithelial cells	CHD9	up
SMIM7	0	0.330321	0.32	0.155	0	Epithelial cells	SMIM7	up
PEMT	0	0.328441	0.132	0.022	0	Epithelial cells	PEMT	up
IFT43	0	0.328198	0.164	0.041	0	Epithelial cells	IFT43	up
SSBP2	0	0.327977	0.166	0.048	0	Epithelial cells	SSBP2	up
ZMYND11	0	0.327469	0.204	0.073	0	Epithelial cells	ZMYND11	up
VGLL4	0	0.327389	0.189	0.068	0	Epithelial cells	VGLL4	up
IGF1R	0	0.327365	0.113	0.012	0	Epithelial cells	IGF1R	up
CTD-2626G11.2	0	0.327338	0.105	0.002	0	Epithelial cells	CTD-2626G11.2	up
NUDT8	0	0.327001	0.121	0.019	0	Epithelial cells	NUDT8	up
AGPAT2	0	0.326651	0.203	0.075	0	Epithelial cells	AGPAT2	up
UBE2M	0	0.326577	0.236	0.108	0	Epithelial cells	UBE2M	up
ZHX1	0	0.326052	0.161	0.057	0	Epithelial cells	ZHX1	up
TPCN1	0	0.324621	0.106	0.028	0	Epithelial cells	TPCN1	up
SPAG16	0	0.324617	0.158	0.037	0	Epithelial cells	SPAG16	up
U47924.27	0	0.324117	0.102	0.002	0	Epithelial cells	U47924.27	up
TP53I3	0	0.32394	0.121	0.03	0	Epithelial cells	TP53I3	up
DNAJC3	0	0.323575	0.301	0.146	0	Epithelial cells	DNAJC3	up
LYRM2	0	0.323548	0.232	0.094	0	Epithelial cells	LYRM2	up
FMR1	0	0.323445	0.187	0.065	0	Epithelial cells	FMR1	up
BRI3	0	0.323332	0.475	0.254	0	Epithelial cells	BRI3	up
SLC35F5	0	0.323266	0.142	0.038	0	Epithelial cells	SLC35F5	up
NF1	0	0.322413	0.183	0.065	0	Epithelial cells	NF1	up
MOCS2	0	0.322115	0.211	0.082	0	Epithelial cells	MOCS2	up
SULT1A1	0	0.321958	0.13	0.026	0	Epithelial cells	SULT1A1	up
UBXN6	0	0.321952	0.164	0.054	0	Epithelial cells	UBXN6	up
PHYHD1	0	0.32067	0.107	0.007	0	Epithelial cells	PHYHD1	up
MYO9A	0	0.320411	0.14	0.045	0	Epithelial cells	MYO9A	up
EVI5	0	0.320194	0.154	0.051	0	Epithelial cells	EVI5	up
LONP2	0	0.320057	0.216	0.086	0	Epithelial cells	LONP2	up
CLUAP1	0	0.319339	0.123	0.029	0	Epithelial cells	CLUAP1	up
ABCC3	0	0.319177	0.103	0.016	0	Epithelial cells	ABCC3	up
ATP13A3	0	0.319124	0.184	0.066	0	Epithelial cells	ATP13A3	up
PAIP1	0	0.318063	0.236	0.106	0	Epithelial cells	PAIP1	up
CHPF	0	0.317733	0.123	0.021	0	Epithelial cells	CHPF	up
TCTN1	0	0.317325	0.124	0.017	0	Epithelial cells	TCTN1	up
CDC27	0	0.316922	0.193	0.074	0	Epithelial cells	CDC27	up
NR1D2	0	0.316625	0.166	0.054	0	Epithelial cells	NR1D2	up
RNF170	0	0.316562	0.149	0.037	0	Epithelial cells	RNF170	up
METTL7B	0	0.315539	0.105	0.003	0	Epithelial cells	METTL7B	up
NQO1	0	0.315179	0.131	0.02	0	Epithelial cells	NQO1	up
WWC2	0	0.314586	0.108	0.017	0	Epithelial cells	WWC2	up
RXRG	0	0.313025	0.105	0.005	0	Epithelial cells	RXRG	up
ACO1	0	0.312674	0.121	0.022	0	Epithelial cells	ACO1	up
ARSD	0	0.312662	0.113	0.029	0	Epithelial cells	ARSD	up
CES2	0	0.312603	0.103	0.027	0	Epithelial cells	CES2	up
C11orf49	0	0.311926	0.131	0.025	0	Epithelial cells	C11orf49	up
NTPCR	0	0.311701	0.161	0.054	0	Epithelial cells	NTPCR	up
NPEPPS	0	0.310559	0.211	0.091	0	Epithelial cells	NPEPPS	up
YIPF6	0	0.310156	0.207	0.074	0	Epithelial cells	YIPF6	up
TMEM179B	0	0.310126	0.329	0.171	0	Epithelial cells	TMEM179B	up
NUDT14	0	0.310094	0.183	0.072	0	Epithelial cells	NUDT14	up
MSMO1	0	0.309861	0.162	0.045	0	Epithelial cells	MSMO1	up
JADE1	0	0.309393	0.19	0.062	0	Epithelial cells	JADE1	up
CTD-2020K17.4	0	0.30931	0.115	0.012	0	Epithelial cells	CTD-2020K17.4	up
TMED1	0	0.308737	0.158	0.041	0	Epithelial cells	TMED1	up
ARHGAP12	0	0.308644	0.143	0.035	0	Epithelial cells	ARHGAP12	up
CRIP2	0	0.30861	0.275	0.077	0	Epithelial cells	CRIP2	up
SPTAN1	0	0.308594	0.303	0.136	0	Epithelial cells	SPTAN1	up
CEP70	0	0.307991	0.106	0.013	0	Epithelial cells	CEP70	up
NT5C2	0	0.307823	0.158	0.047	0	Epithelial cells	NT5C2	up
GAMT	0	0.30693	0.121	0.033	0	Epithelial cells	GAMT	up
GLT8D1	0	0.306908	0.177	0.058	0	Epithelial cells	GLT8D1	up
PVRL3	0	0.306778	0.106	0.011	0	Epithelial cells	PVRL3	up
SAV1	0	0.306007	0.146	0.041	0	Epithelial cells	SAV1	up
MANBAL	0	0.305836	0.143	0.03	0	Epithelial cells	MANBAL	up
RPRD1A	0	0.304127	0.143	0.045	0	Epithelial cells	RPRD1A	up
RPS6KA2	0	0.303587	0.1	0.015	0	Epithelial cells	RPS6KA2	up
ACVR1	0	0.301948	0.111	0.019	0	Epithelial cells	ACVR1	up
TRIQK	0	0.301609	0.121	0.026	0	Epithelial cells	TRIQK	up
PURA	0	0.301357	0.22	0.093	0	Epithelial cells	PURA	up
ZSWIM7	0	0.301254	0.246	0.108	0	Epithelial cells	ZSWIM7	up
STARD10	0	0.300312	0.12	0.018	0	Epithelial cells	STARD10	up
SLC39A7	0	0.299903	0.155	0.052	0	Epithelial cells	SLC39A7	up
RERE	0	0.299409	0.198	0.078	0	Epithelial cells	RERE	up
ARMC10	0	0.299242	0.218	0.09	0	Epithelial cells	ARMC10	up
HSD17B8	0	0.298639	0.13	0.027	0	Epithelial cells	HSD17B8	up
RARRES2	0	0.29852	0.134	0.021	0	Epithelial cells	RARRES2	up
ZNF91	0	0.298477	0.171	0.061	0	Epithelial cells	ZNF91	up
TCEA2	0	0.297162	0.155	0.042	0	Epithelial cells	TCEA2	up
IFT88	0	0.296288	0.112	0.024	0	Epithelial cells	IFT88	up
SERINC1	0	0.295904	0.338	0.175	0	Epithelial cells	SERINC1	up
ITFG1	0	0.29497	0.217	0.09	0	Epithelial cells	ITFG1	up
SNX25	0	0.294559	0.102	0.012	0	Epithelial cells	SNX25	up
TMED7	0	0.292983	0.187	0.073	0	Epithelial cells	TMED7	up
SPRY1	0	0.292768	0.266	0.096	0	Epithelial cells	SPRY1	up
RNF146	0	0.292635	0.174	0.059	0	Epithelial cells	RNF146	up
PTRF	0	0.291621	0.198	0.055	0	Epithelial cells	PTRF	up
AHI1	0	0.291268	0.198	0.068	0	Epithelial cells	AHI1	up
ZYG11B	0	0.290303	0.119	0.035	0	Epithelial cells	ZYG11B	up
RCOR3	0	0.290005	0.163	0.06	0	Epithelial cells	RCOR3	up
LAPTM4B	0	0.288678	0.133	0.036	0	Epithelial cells	LAPTM4B	up
TMEM263	0	0.288534	0.174	0.065	0	Epithelial cells	TMEM263	up
TFDP2	0	0.288406	0.187	0.064	0	Epithelial cells	TFDP2	up
SLC22A18	0	0.288309	0.108	0.028	0	Epithelial cells	SLC22A18	up
PLPP5	0	0.287421	0.187	0.068	0	Epithelial cells	PLPP5	up
MIR4458HG	0	0.287211	0.146	0.034	0	Epithelial cells	MIR4458HG	up
EMP1	0	0.286996	0.206	0.071	0	Epithelial cells	EMP1	up
CD81	0	0.286982	0.57	0.318	0	Epithelial cells	CD81	up
MCTP2	0	0.286383	0.116	0.027	0	Epithelial cells	MCTP2	up
TNIK	0	0.286327	0.148	0.043	0	Epithelial cells	TNIK	up
ERGIC1	0	0.285545	0.164	0.06	0	Epithelial cells	ERGIC1	up
NAE1	0	0.284393	0.209	0.087	0	Epithelial cells	NAE1	up
LINC00665	0	0.283628	0.101	0.014	0	Epithelial cells	LINC00665	up
WRB	0	0.28349	0.173	0.045	0	Epithelial cells	WRB	up
MMAB	0	0.283299	0.127	0.027	0	Epithelial cells	MMAB	up
GPAA1	0	0.282986	0.22	0.091	0	Epithelial cells	GPAA1	up
TMEM41B	0	0.281518	0.165	0.055	0	Epithelial cells	TMEM41B	up
RBFOX2	0	0.279814	0.11	0.017	0	Epithelial cells	RBFOX2	up
TM2D1	0	0.279741	0.268	0.125	0	Epithelial cells	TM2D1	up
CREG1	0	0.279651	0.244	0.11	0	Epithelial cells	CREG1	up
FBN1	0	0.27834	0.123	0.029	0	Epithelial cells	FBN1	up
SDF2	0	0.278163	0.261	0.122	0	Epithelial cells	SDF2	up
LRBA	0	0.276156	0.173	0.064	0	Epithelial cells	LRBA	up
SLC40A1	0	0.276086	0.257	0.082	0	Epithelial cells	SLC40A1	up
DYNC2LI1	0	0.276032	0.118	0.022	0	Epithelial cells	DYNC2LI1	up
ATN1	0	0.274386	0.139	0.04	0	Epithelial cells	ATN1	up
TXNDC15	0	0.273791	0.225	0.098	0	Epithelial cells	TXNDC15	up
ZMAT1	0	0.273367	0.138	0.038	0	Epithelial cells	ZMAT1	up
SIPA1L2	0	0.272763	0.106	0.028	0	Epithelial cells	SIPA1L2	up
NDUFAF6	0	0.272646	0.135	0.035	0	Epithelial cells	NDUFAF6	up
PTGR1	0	0.272157	0.116	0.023	0	Epithelial cells	PTGR1	up
SUN1	0	0.271512	0.136	0.042	0	Epithelial cells	SUN1	up
ABCD3	0	0.270927	0.124	0.032	0	Epithelial cells	ABCD3	up
SMAD5	0	0.270755	0.171	0.061	0	Epithelial cells	SMAD5	up
RASA1	0	0.270616	0.147	0.047	0	Epithelial cells	RASA1	up
BAD	0	0.269424	0.203	0.08	0	Epithelial cells	BAD	up
SCAMP1	0	0.26925	0.16	0.057	0	Epithelial cells	SCAMP1	up
PTPRG	0	0.268942	0.133	0.026	0	Epithelial cells	PTPRG	up
SEPT10	0	0.267909	0.118	0.034	0	Epithelial cells	SEPT10	up
PLEK2	0	0.267548	0.115	0.027	0	Epithelial cells	PLEK2	up
ERLIN2	0	0.267386	0.115	0.028	0	Epithelial cells	ERLIN2	up
CCNB1IP1	0	0.266185	0.171	0.06	0	Epithelial cells	CCNB1IP1	up
PREPL	0	0.265992	0.166	0.053	0	Epithelial cells	PREPL	up
NAB2	0	0.265869	0.102	0.016	0	Epithelial cells	NAB2	up
TPT1	0	0.265651	0.985	0.957	0	Epithelial cells	TPT1	up
MAP9	0	0.265147	0.125	0.028	0	Epithelial cells	MAP9	up
FERMT2	0	0.26509	0.14	0.033	0	Epithelial cells	FERMT2	up
RBMS2	0	0.264961	0.107	0.027	0	Epithelial cells	RBMS2	up
TMEM43	0	0.264785	0.173	0.066	0	Epithelial cells	TMEM43	up
GSTA4	0	0.26394	0.112	0.019	0	Epithelial cells	GSTA4	up
C11orf1	0	0.262009	0.135	0.044	0	Epithelial cells	C11orf1	up
NBAS	0	0.25783	0.125	0.038	0	Epithelial cells	NBAS	up
EIF3J-AS1	0	0.257164	0.128	0.033	0	Epithelial cells	EIF3J-AS1	up
USP18	0	0.255874	0.131	0.041	0	Epithelial cells	USP18	up
NT5C3B	0	0.254842	0.119	0.03	0	Epithelial cells	NT5C3B	up
RHBDD2	0	0.253712	0.251	0.11	0	Epithelial cells	RHBDD2	up
PIK3CB	0	0.25312	0.133	0.041	0	Epithelial cells	PIK3CB	up
IMMP2L	0	0.250984	0.109	0.024	0	Epithelial cells	IMMP2L	up
RPL10	0	-0.335776	0.984	0.982	0	Epithelial cells	RPL10	down
RPL28	0	-0.374192	0.975	0.969	0	Epithelial cells	RPL28	down
RPS7	0	-0.382126	0.91	0.912	0	Epithelial cells	RPS7	down
BST2	0	-0.419873	0.181	0.383	0	Epithelial cells	BST2	down
RPS27A	0	-0.42539	0.966	0.96	0	Epithelial cells	RPS27A	down
RPL41	0	-0.427202	0.964	0.956	0	Epithelial cells	RPL41	down
RPL19	0	-0.455599	0.935	0.94	0	Epithelial cells	RPL19	down
GPRIN3	0	-0.462226	0.011	0.105	0	Epithelial cells	GPRIN3	down
ATP5E	0	-0.480055	0.804	0.847	0	Epithelial cells	ATP5E	down
ARHGAP4	0	-0.498639	0.013	0.117	0	Epithelial cells	ARHGAP4	down
RPL39	0	-0.501927	0.941	0.944	0	Epithelial cells	RPL39	down
CSF1R	0	-0.502381	0.008	0.1	0	Epithelial cells	CSF1R	down
LAIR1	0	-0.504802	0.004	0.101	0	Epithelial cells	LAIR1	down
RPS15	0	-0.508961	0.933	0.936	0	Epithelial cells	RPS15	down
LAT2	0	-0.513363	0.007	0.109	0	Epithelial cells	LAT2	down
PSMB8-AS1	0	-0.517255	0.021	0.123	0	Epithelial cells	PSMB8-AS1	down
EIF1	0	-0.518932	0.896	0.918	0	Epithelial cells	EIF1	down
RPL35A	0	-0.52177	0.89	0.894	0	Epithelial cells	RPL35A	down
DOCK2	0	-0.524892	0.013	0.119	0	Epithelial cells	DOCK2	down
PARVG	0	-0.532497	0.01	0.125	0	Epithelial cells	PARVG	down
RPS18	0	-0.537489	0.98	0.968	0	Epithelial cells	RPS18	down
ITK	0	-0.541569	0.009	0.1	0	Epithelial cells	ITK	down
IL16	0	-0.545898	0.007	0.117	0	Epithelial cells	IL16	down
NABP1	0	-0.546521	0.028	0.134	0	Epithelial cells	NABP1	down
SPARC	0	-0.54874	0.289	0.111	0	Epithelial cells	SPARC	down
RGS19	0	-0.549524	0.039	0.154	0	Epithelial cells	RGS19	down
SIT1	0	-0.553563	0.012	0.11	0	Epithelial cells	SIT1	down
PIM1	0	-0.556536	0.019	0.121	0	Epithelial cells	PIM1	down
ABI3	0	-0.556591	0.006	0.116	0	Epithelial cells	ABI3	down
RPL34	0	-0.556742	0.944	0.944	0	Epithelial cells	RPL34	down
NCKAP1L	0	-0.560653	0.009	0.129	0	Epithelial cells	NCKAP1L	down
RPL37	0	-0.564542	0.907	0.9	0	Epithelial cells	RPL37	down
HMHA1	0	-0.565278	0.02	0.129	0	Epithelial cells	HMHA1	down
CD86	0	-0.566829	0.006	0.115	0	Epithelial cells	CD86	down
SNX10	0	-0.567302	0.019	0.14	0	Epithelial cells	SNX10	down
RPL13	0	-0.57043	0.975	0.966	0	Epithelial cells	RPL13	down
SELPLG	0	-0.572783	0.007	0.115	0	Epithelial cells	SELPLG	down
RPLP1	0	-0.580892	0.98	0.973	0	Epithelial cells	RPLP1	down
GIMAP1	0	-0.581643	0.008	0.117	0	Epithelial cells	GIMAP1	down
SH2D1A	0	-0.583462	0.01	0.104	0	Epithelial cells	SH2D1A	down
RPL9	0	-0.584112	0.849	0.868	0	Epithelial cells	RPL9	down
CD4	0	-0.584417	0.013	0.133	0	Epithelial cells	CD4	down
DPYSL2	0	-0.584552	0.037	0.154	0	Epithelial cells	DPYSL2	down
RASAL3	0	-0.585624	0.01	0.12	0	Epithelial cells	RASAL3	down
PLEKHO1	0	-0.588933	0.024	0.14	0	Epithelial cells	PLEKHO1	down
LPXN	0	-0.594351	0.017	0.141	0	Epithelial cells	LPXN	down
HAVCR2	0	-0.594503	0.012	0.121	0	Epithelial cells	HAVCR2	down
FAM26F	0	-0.597749	0.009	0.109	0	Epithelial cells	FAM26F	down
TNFSF13B	0	-0.598054	0.018	0.128	0	Epithelial cells	TNFSF13B	down
SH2D2A	0	-0.601011	0.01	0.107	0	Epithelial cells	SH2D2A	down
TMSB10	0	-0.615	0.978	0.977	0	Epithelial cells	TMSB10	down
ANKRD44	0	-0.619486	0.027	0.152	0	Epithelial cells	ANKRD44	down
PTPN6	0	-0.621218	0.048	0.175	0	Epithelial cells	PTPN6	down
RPS25	0	-0.624194	0.887	0.895	0	Epithelial cells	RPS25	down
SKAP1	0	-0.629564	0.016	0.127	0	Epithelial cells	SKAP1	down
ARHGAP30	0	-0.630469	0.016	0.147	0	Epithelial cells	ARHGAP30	down
TRAT1	0	-0.637441	0.006	0.103	0	Epithelial cells	TRAT1	down
RPL32	0	-0.638126	0.956	0.952	0	Epithelial cells	RPL32	down
RPS3	0	-0.638964	0.925	0.935	0	Epithelial cells	RPS3	down
PIP4K2A	0	-0.639437	0.06	0.189	0	Epithelial cells	PIP4K2A	down
MSR1	0	-0.640719	0.008	0.1	0	Epithelial cells	MSR1	down
SPN	0	-0.640871	0.009	0.134	0	Epithelial cells	SPN	down
FERMT3	0	-0.642024	0.014	0.152	0	Epithelial cells	FERMT3	down
LY86	0	-0.643936	0.004	0.129	0	Epithelial cells	LY86	down
SAMD3	0	-0.644709	0.011	0.108	0	Epithelial cells	SAMD3	down
MAP3K8	0	-0.647512	0.032	0.145	0	Epithelial cells	MAP3K8	down
PIM2	0	-0.651277	0.013	0.112	0	Epithelial cells	PIM2	down
PYHIN1	0	-0.654831	0.014	0.117	0	Epithelial cells	PYHIN1	down
SERPINB9	0	-0.655283	0.044	0.161	0	Epithelial cells	SERPINB9	down
GLIPR2	0	-0.656439	0.028	0.152	0	Epithelial cells	GLIPR2	down
FCGR2B	0	-0.658143	0.01	0.111	0	Epithelial cells	FCGR2B	down
ARHGEF1	0	-0.658519	0.05	0.174	0	Epithelial cells	ARHGEF1	down
MYO1F	0	-0.661304	0.009	0.137	0	Epithelial cells	MYO1F	down
ICOS	0	-0.661593	0.017	0.115	0	Epithelial cells	ICOS	down
SUB1	0	-0.66228	0.557	0.63	0	Epithelial cells	SUB1	down
CD84	0	-0.663141	0.016	0.144	0	Epithelial cells	CD84	down
LY96	0	-0.666263	0.021	0.157	0	Epithelial cells	LY96	down
IRF8	0	-0.66781	0.008	0.115	0	Epithelial cells	IRF8	down
ARRB2	0	-0.668828	0.017	0.163	0	Epithelial cells	ARRB2	down
ARPC5	0	-0.6707	0.369	0.482	0	Epithelial cells	ARPC5	down
RPS14	0	-0.671664	0.921	0.925	0	Epithelial cells	RPS14	down
RPL18A	0	-0.676281	0.914	0.92	0	Epithelial cells	RPL18A	down
CASP1	0	-0.676864	0.023	0.174	0	Epithelial cells	CASP1	down
ARHGAP9	0	-0.681167	0.013	0.144	0	Epithelial cells	ARHGAP9	down
GLRX	0	-0.685374	0.117	0.271	0	Epithelial cells	GLRX	down
CASP4	0	-0.687267	0.05	0.201	0	Epithelial cells	CASP4	down
RPSA	0	-0.689838	0.729	0.761	0	Epithelial cells	RPSA	down
FMNL1	0	-0.690883	0.028	0.163	0	Epithelial cells	FMNL1	down
ITGA4	0	-0.691899	0.035	0.175	0	Epithelial cells	ITGA4	down
RCSD1	0	-0.69488	0.012	0.16	0	Epithelial cells	RCSD1	down
ANXA6	0	-0.697863	0.05	0.179	0	Epithelial cells	ANXA6	down
CALM1	0	-0.701047	0.626	0.706	0	Epithelial cells	CALM1	down
PTPN7	0	-0.702832	0.016	0.143	0	Epithelial cells	PTPN7	down
PTPN22	0	-0.713173	0.017	0.149	0	Epithelial cells	PTPN22	down
LAIR2	0	-0.71874	0.008	0.102	0	Epithelial cells	LAIR2	down
MYL12A	0	-0.71899	0.689	0.758	0	Epithelial cells	MYL12A	down
OSTF1	0	-0.7203	0.157	0.293	0	Epithelial cells	OSTF1	down
ARPC1B	0	-0.726522	0.366	0.503	0	Epithelial cells	ARPC1B	down
FKBP5	0	-0.726624	0.084	0.218	0	Epithelial cells	FKBP5	down
PTGER4	0	-0.726689	0.029	0.162	0	Epithelial cells	PTGER4	down
BIN2	0	-0.728135	0.013	0.16	0	Epithelial cells	BIN2	down
OAZ1	0	-0.732405	0.677	0.752	0	Epithelial cells	OAZ1	down
RPL35	0	-0.732756	0.796	0.857	0	Epithelial cells	RPL35	down
IL10RA	0	-0.735443	0.021	0.174	0	Epithelial cells	IL10RA	down
LCP2	0	-0.735528	0.017	0.172	0	Epithelial cells	LCP2	down
DOCK8	0	-0.735916	0.029	0.192	0	Epithelial cells	DOCK8	down
IKZF1	0	-0.739166	0.017	0.176	0	Epithelial cells	IKZF1	down
RPS15A	0	-0.748835	0.943	0.943	0	Epithelial cells	RPS15A	down
CD96	0	-0.760798	0.029	0.152	0	Epithelial cells	CD96	down
LAT	0	-0.761046	0.024	0.161	0	Epithelial cells	LAT	down
SMAP2	0	-0.768005	0.085	0.239	0	Epithelial cells	SMAP2	down
CLEC7A	0	-0.774185	0.02	0.142	0	Epithelial cells	CLEC7A	down
ICAM3	0	-0.77546	0.069	0.21	0	Epithelial cells	ICAM3	down
WAS	0	-0.775651	0.012	0.181	0	Epithelial cells	WAS	down
PYCARD	0	-0.784185	0.097	0.236	0	Epithelial cells	PYCARD	down
MBNL1	0	-0.785887	0.171	0.341	0	Epithelial cells	MBNL1	down
PDE4B	0	-0.78864	0.024	0.161	0	Epithelial cells	PDE4B	down
SH3KBP1	0	-0.794251	0.055	0.231	0	Epithelial cells	SH3KBP1	down
HLA-F	0	-0.796293	0.094	0.278	0	Epithelial cells	HLA-F	down
KLF6	0	-0.796622	0.465	0.634	0	Epithelial cells	KLF6	down
MCL1	0	-0.802221	0.309	0.441	0	Epithelial cells	MCL1	down
RUNX3	0	-0.804482	0.015	0.148	0	Epithelial cells	RUNX3	down
BATF	0	-0.804661	0.019	0.142	0	Epithelial cells	BATF	down
APOBEC3G	0	-0.807173	0.055	0.193	0	Epithelial cells	APOBEC3G	down
TBC1D10C	0	-0.808842	0.036	0.184	0	Epithelial cells	TBC1D10C	down
JAML	0	-0.811575	0.011	0.162	0	Epithelial cells	JAML	down
TAGAP	0	-0.812629	0.023	0.181	0	Epithelial cells	TAGAP	down
ARHGAP15	0	-0.81303	0.013	0.18	0	Epithelial cells	ARHGAP15	down
APBB1IP	0	-0.81306	0.023	0.202	0	Epithelial cells	APBB1IP	down
CD99	0	-0.814912	0.31	0.472	0	Epithelial cells	CD99	down
RHOG	0	-0.815767	0.07	0.246	0	Epithelial cells	RHOG	down
C12orf75	0	-0.821159	0.046	0.173	0	Epithelial cells	C12orf75	down
ARID5A	0	-0.824536	0.016	0.171	0	Epithelial cells	ARID5A	down
IFI16	0	-0.825259	0.198	0.408	0	Epithelial cells	IFI16	down
ATP5EP2	0	-0.829483	0.022	0.159	0	Epithelial cells	ATP5EP2	down
TRAF3IP3	0	-0.83118	0.016	0.183	0	Epithelial cells	TRAF3IP3	down
SOCS3	0	-0.835013	0.03	0.158	0	Epithelial cells	SOCS3	down
SEPT1	0	-0.83825	0.048	0.2	0	Epithelial cells	SEPT1	down
CYBA	0	-0.839752	0.67	0.735	0	Epithelial cells	CYBA	down
ARID5B	0	-0.842572	0.087	0.237	0	Epithelial cells	ARID5B	down
CELF2	0	-0.844003	0.093	0.288	0	Epithelial cells	CELF2	down
FAM49B	0	-0.847484	0.159	0.321	0	Epithelial cells	FAM49B	down
FCGR2A	0	-0.847829	0.021	0.147	0	Epithelial cells	FCGR2A	down
ACAP1	0	-0.849253	0.057	0.212	0	Epithelial cells	ACAP1	down
ACTR3	0	-0.850177	0.226	0.411	0	Epithelial cells	ACTR3	down
PPP1R18	0	-0.85137	0.031	0.219	0	Epithelial cells	PPP1R18	down
SPI1	0	-0.854733	0.018	0.157	0	Epithelial cells	SPI1	down
GNG2	0	-0.854743	0.014	0.177	0	Epithelial cells	GNG2	down
RPS6	0	-0.859533	0.898	0.888	0	Epithelial cells	RPS6	down
AP1S2	0	-0.859673	0.061	0.218	0	Epithelial cells	AP1S2	down
TNFRSF1B	0	-0.865255	0.06	0.215	0	Epithelial cells	TNFRSF1B	down
RNASE6	0	-0.872533	0.006	0.151	0	Epithelial cells	RNASE6	down
PABPC1	0	-0.875478	0.541	0.644	0	Epithelial cells	PABPC1	down
RPL37A	0	-0.876407	0.745	0.764	0	Epithelial cells	RPL37A	down
RPS19	0	-0.876506	0.956	0.959	0	Epithelial cells	RPS19	down
TUBA4A	0	-0.877814	0.065	0.2	0	Epithelial cells	TUBA4A	down
UBA52	0	-0.879767	0.744	0.804	0	Epithelial cells	UBA52	down
TXNIP	0	-0.880005	0.53	0.602	0	Epithelial cells	TXNIP	down
DOK2	0	-0.882818	0.026	0.209	0	Epithelial cells	DOK2	down
MRC1	0	-0.884514	0.012	0.116	0	Epithelial cells	MRC1	down
ADGRE5	0	-0.887313	0.113	0.251	0	Epithelial cells	ADGRE5	down
SAMHD1	0	-0.892159	0.071	0.261	0	Epithelial cells	SAMHD1	down
SEPT6	0	-0.892737	0.025	0.215	0	Epithelial cells	SEPT6	down
CD8A	0	-0.895591	0.024	0.141	0	Epithelial cells	CD8A	down
EVI2A	0	-0.896105	0.012	0.202	0	Epithelial cells	EVI2A	down
RPL38	0	-0.903777	0.708	0.755	0	Epithelial cells	RPL38	down
GZMM	0	-0.909397	0.014	0.156	0	Epithelial cells	GZMM	down
AC092580.4	0	-0.915372	0.006	0.116	0	Epithelial cells	AC092580.4	down
GPR65	0	-0.927794	0.01	0.189	0	Epithelial cells	GPR65	down
HLA-C	0	-0.931058	0.799	0.92	0	Epithelial cells	HLA-C	down
IFITM1	0	-0.934284	0.041	0.195	0	Epithelial cells	IFITM1	down
WIPF1	0	-0.936774	0.054	0.263	0	Epithelial cells	WIPF1	down
RPS26	0	-0.941128	0.66	0.686	0	Epithelial cells	RPS26	down
IGSF6	0	-0.9415	0.027	0.163	0	Epithelial cells	IGSF6	down
TPM4	0	-0.943188	0.141	0.331	0	Epithelial cells	TPM4	down
CD27	0	-0.94741	0.041	0.183	0	Epithelial cells	CD27	down
RPS11	0	-0.952024	0.674	0.732	0	Epithelial cells	RPS11	down
BIRC3	0	-0.952217	0.06	0.226	0	Epithelial cells	BIRC3	down
GLIPR1	0	-0.955284	0.026	0.229	0	Epithelial cells	GLIPR1	down
RPL27	0	-0.958401	0.741	0.81	0	Epithelial cells	RPL27	down
LEPROTL1	0	-0.965899	0.206	0.358	0	Epithelial cells	LEPROTL1	down
SLA	0	-0.9666	0.027	0.224	0	Epithelial cells	SLA	down
CYBB	0	-0.971504	0.022	0.168	0	Epithelial cells	CYBB	down
NCF1	0	-0.971903	0.015	0.192	0	Epithelial cells	NCF1	down
JUNB	0	-0.978892	0.571	0.677	0	Epithelial cells	JUNB	down
SELL	0	-0.982515	0.016	0.173	0	Epithelial cells	SELL	down
HMGB2	0	-0.986697	0.195	0.363	0	Epithelial cells	HMGB2	down
PLEK	0	-0.989884	0.018	0.182	0	Epithelial cells	PLEK	down
STK17A	0	-0.999622	0.111	0.318	0	Epithelial cells	STK17A	down
RHOH	0	-1.00576	0.014	0.211	0	Epithelial cells	RHOH	down
CD247	0	-1.00626	0.016	0.188	0	Epithelial cells	CD247	down
CD68	0	-1.0139	0.024	0.166	0	Epithelial cells	CD68	down
NR4A2	0	-1.01494	0.05	0.217	0	Epithelial cells	NR4A2	down
EMP3	0	-1.01515	0.28	0.473	0	Epithelial cells	EMP3	down
FGL2	0	-1.01545	0.02	0.181	0	Epithelial cells	FGL2	down
TUBA1A	0	-1.01887	0.13	0.302	0	Epithelial cells	TUBA1A	down
RGS10	0	-1.01924	0.101	0.303	0	Epithelial cells	RGS10	down
PSMB9	0	-1.01971	0.16	0.425	0	Epithelial cells	PSMB9	down
ZEB2	0	-1.02545	0.021	0.216	0	Epithelial cells	ZEB2	down
ARPC2	0	-1.02715	0.463	0.638	0	Epithelial cells	ARPC2	down
TIGIT	0	-1.04324	0.026	0.174	0	Epithelial cells	TIGIT	down
CD83	0	-1.04457	0.061	0.191	0	Epithelial cells	CD83	down
PLAC8	0	-1.04969	0.022	0.176	0	Epithelial cells	PLAC8	down
GIMAP7	0	-1.053	0.016	0.203	0	Epithelial cells	GIMAP7	down
SDCBP	0	-1.0653	0.212	0.381	0	Epithelial cells	SDCBP	down
HLA-DQA2	0	-1.06649	0.103	0.288	0	Epithelial cells	HLA-DQA2	down
GIMAP4	0	-1.06777	0.023	0.233	0	Epithelial cells	GIMAP4	down
B2M	0	-1.07436	0.995	0.997	0	Epithelial cells	B2M	down
RPL7	0	-1.07642	0.676	0.738	0	Epithelial cells	RPL7	down
ETS1	0	-1.07956	0.082	0.281	0	Epithelial cells	ETS1	down
CFL1	0	-1.07971	0.659	0.796	0	Epithelial cells	CFL1	down
HLA-A	0	-1.09097	0.776	0.887	0	Epithelial cells	HLA-A	down
NFKBIA	0	-1.09765	0.36	0.565	0	Epithelial cells	NFKBIA	down
CTSW	0	-1.10237	0.03	0.162	0	Epithelial cells	CTSW	down
HCLS1	0	-1.10697	0.027	0.293	0	Epithelial cells	HCLS1	down
LCK	0	-1.10876	0.022	0.234	0	Epithelial cells	LCK	down
CLEC2B	0	-1.11023	0.102	0.36	0	Epithelial cells	CLEC2B	down
GYPC	0	-1.1116	0.018	0.252	0	Epithelial cells	GYPC	down
STK4	0	-1.11333	0.1	0.337	0	Epithelial cells	STK4	down
CARD16	0	-1.12471	0.035	0.274	0	Epithelial cells	CARD16	down
FXYD5	0	-1.12757	0.231	0.487	0	Epithelial cells	FXYD5	down
MS4A7	0	-1.13298	0.021	0.15	0	Epithelial cells	MS4A7	down
BCL2A1	0	-1.13365	0.023	0.173	0	Epithelial cells	BCL2A1	down
CLEC2D	0	-1.14344	0.059	0.274	0	Epithelial cells	CLEC2D	down
KLF2	0	-1.14689	0.053	0.261	0	Epithelial cells	KLF2	down
ISG20	0	-1.14694	0.154	0.365	0	Epithelial cells	ISG20	down
PRF1	0	-1.16304	0.015	0.156	0	Epithelial cells	PRF1	down
CRIP1	0	-1.1652	0.18	0.361	0	Epithelial cells	CRIP1	down
HLA-DMA	0	-1.1806	0.173	0.343	0	Epithelial cells	HLA-DMA	down
HLA-B	0	-1.18601	0.837	0.939	0	Epithelial cells	HLA-B	down
AREG	0	-1.18934	0.022	0.142	0	Epithelial cells	AREG	down
EVI2B	0	-1.19481	0.016	0.273	0	Epithelial cells	EVI2B	down
RPS16	0	-1.19624	0.726	0.789	0	Epithelial cells	RPS16	down
TNFRSF4	0	-1.19944	0.025	0.131	0	Epithelial cells	TNFRSF4	down
ITM2A	0	-1.20649	0.139	0.293	0	Epithelial cells	ITM2A	down
MEF2C	0	-1.20964	0.086	0.24	0	Epithelial cells	MEF2C	down
RPS27	0	-1.20981	0.977	0.968	0	Epithelial cells	RPS27	down
RPL23A	0	-1.21578	0.8	0.834	0	Epithelial cells	RPL23A	down
FYB	0	-1.21846	0.046	0.334	0	Epithelial cells	FYB	down
HLA-E	0	-1.21872	0.504	0.793	0	Epithelial cells	HLA-E	down
RPS2	0	-1.21945	0.795	0.84	0	Epithelial cells	RPS2	down
ZFP36L2	0	-1.22168	0.442	0.626	0	Epithelial cells	ZFP36L2	down
ARL4C	0	-1.23015	0.037	0.266	0	Epithelial cells	ARL4C	down
C1orf162	0	-1.24393	0.016	0.215	0	Epithelial cells	C1orf162	down
RPL17	0	-1.26169	0.322	0.513	0	Epithelial cells	RPL17	down
SGK1	0	-1.26692	0.088	0.218	0	Epithelial cells	SGK1	down
FCGR3A	0	-1.27918	0.017	0.174	0	Epithelial cells	FCGR3A	down
KLRD1	0	-1.28989	0.007	0.119	0	Epithelial cells	KLRD1	down
MNDA	0	-1.29276	0.024	0.177	0	Epithelial cells	MNDA	down
EVL	0	-1.29276	0.073	0.343	0	Epithelial cells	EVL	down
GPSM3	0	-1.293	0.023	0.326	0	Epithelial cells	GPSM3	down
CD48	0	-1.31716	0.023	0.31	0	Epithelial cells	CD48	down
CD3G	0	-1.32025	0.039	0.274	0	Epithelial cells	CD3G	down
SAMSN1	0	-1.33383	0.034	0.293	0	Epithelial cells	SAMSN1	down
GZMK	0	-1.3343	0.026	0.136	0	Epithelial cells	GZMK	down
LST1	0	-1.33546	0.026	0.214	0	Epithelial cells	LST1	down
A2M	0	-1.33634	0.023	0.141	0	Epithelial cells	A2M	down
STK17B	0	-1.3436	0.116	0.433	0	Epithelial cells	STK17B	down
ZFP36	0	-1.35152	0.324	0.55	0	Epithelial cells	ZFP36	down
RGS2	0	-1.3567	0.045	0.268	0	Epithelial cells	RGS2	down
CYTIP	0	-1.37274	0.027	0.33	0	Epithelial cells	CYTIP	down
RPS10	0	-1.38095	0.658	0.751	0	Epithelial cells	RPS10	down
LCP1	0	-1.39107	0.086	0.423	0	Epithelial cells	LCP1	down
ACTB	0	-1.41795	0.907	0.951	0	Epithelial cells	ACTB	down
TNFAIP3	0	-1.4202	0.076	0.369	0	Epithelial cells	TNFAIP3	down
LIMD2	0	-1.43018	0.04	0.359	0	Epithelial cells	LIMD2	down
RAC2	0	-1.451	0.089	0.409	0	Epithelial cells	RAC2	down
CREM	0	-1.46275	0.103	0.298	0	Epithelial cells	CREM	down
DUSP2	0	-1.46701	0.103	0.381	0	Epithelial cells	DUSP2	down
RP11-347P5.1	0	-1.47651	0.005	0.248	0	Epithelial cells	RP11-347P5.1	down
GZMH	0	-1.48007	0.031	0.193	0	Epithelial cells	GZMH	down
RPL27A	0	-1.48418	0.668	0.745	0	Epithelial cells	RPL27A	down
RPL21	0	-1.49148	0.787	0.838	0	Epithelial cells	RPL21	down
ITGB2	0	-1.50222	0.041	0.366	0	Epithelial cells	ITGB2	down
SH3BGRL3	0	-1.53058	0.505	0.737	0	Epithelial cells	SH3BGRL3	down
LSP1	0	-1.53205	0.03	0.36	0	Epithelial cells	LSP1	down
PFN1	0	-1.53498	0.647	0.829	0	Epithelial cells	PFN1	down
COTL1	0	-1.54505	0.107	0.42	0	Epithelial cells	COTL1	down
RPS17	0	-1.55387	0.548	0.652	0	Epithelial cells	RPS17	down
CST7	0	-1.56533	0.05	0.291	0	Epithelial cells	CST7	down
IL2RG	0	-1.56996	0.03	0.361	0	Epithelial cells	IL2RG	down
RPLP2	0	-1.59919	0.805	0.854	0	Epithelial cells	RPLP2	down
RPS20	0	-1.60764	0.481	0.595	0	Epithelial cells	RPS20	down
MS4A6A	0	-1.62114	0.029	0.206	0	Epithelial cells	MS4A6A	down
CCL3L3	0	-1.70733	0.061	0.199	0	Epithelial cells	CCL3L3	down
CD53	0	-1.709	0.028	0.435	0	Epithelial cells	CD53	down
RPL31	0	-1.72931	0.517	0.631	0	Epithelial cells	RPL31	down
HLA-DQB1	0	-1.72976	0.189	0.382	0	Epithelial cells	HLA-DQB1	down
TRBC1	0	-1.73056	0.025	0.256	0	Epithelial cells	TRBC1	down
CD3E	0	-1.73573	0.035	0.363	0	Epithelial cells	CD3E	down
HLA-DRB1	0	-1.74011	0.429	0.604	0	Epithelial cells	HLA-DRB1	down
CD7	0	-1.7443	0.023	0.294	0	Epithelial cells	CD7	down
IL7R	0	-1.74782	0.03	0.27	0	Epithelial cells	IL7R	down
TMSB4X	0	-1.75411	0.946	0.989	0	Epithelial cells	TMSB4X	down
GMFG	0	-1.76031	0.042	0.486	0	Epithelial cells	GMFG	down
RPS29	0	-1.77903	0.809	0.869	0	Epithelial cells	RPS29	down
GPR183	0	-1.79089	0.036	0.33	0	Epithelial cells	GPR183	down
RPL13A	0	-1.79319	0.658	0.712	0	Epithelial cells	RPL13A	down
CD2	0	-1.79458	0.071	0.402	0	Epithelial cells	CD2	down
C1QC	0	-1.80186	0.036	0.175	0	Epithelial cells	C1QC	down
AIF1	0	-1.8084	0.039	0.252	0	Epithelial cells	AIF1	down
HLA-DRB5	0	-1.8092	0.275	0.47	0	Epithelial cells	HLA-DRB5	down
ARHGDIB	0	-1.84746	0.283	0.689	0	Epithelial cells	ARHGDIB	down
C1QB	0	-1.85182	0.032	0.168	0	Epithelial cells	C1QB	down
CD37	0	-1.85214	0.033	0.463	0	Epithelial cells	CD37	down
RPL36A	0	-1.86813	0.382	0.589	0	Epithelial cells	RPL36A	down
HLA-DPA1	0	-1.88736	0.287	0.557	0	Epithelial cells	HLA-DPA1	down
KLRB1	0	-1.88966	0.011	0.169	0	Epithelial cells	KLRB1	down
GZMB	0	-1.89216	0.038	0.214	0	Epithelial cells	GZMB	down
C1QA	0	-1.91412	0.034	0.178	0	Epithelial cells	C1QA	down
HLA-DQA1	0	-1.92879	0.127	0.38	0	Epithelial cells	HLA-DQA1	down
ALOX5AP	0	-1.93091	0.038	0.365	0	Epithelial cells	ALOX5AP	down
GZMA	0	-1.93125	0.043	0.268	0	Epithelial cells	GZMA	down
IGHG4	0	-1.93532	0.018	0.167	0	Epithelial cells	IGHG4	down
TRBC2	0	-1.9432	0.066	0.414	0	Epithelial cells	TRBC2	down
CORO1A	0	-1.95317	0.068	0.516	0	Epithelial cells	CORO1A	down
CD74	0	-1.96395	0.635	0.761	0	Epithelial cells	CD74	down
LTB	0	-1.97279	0.042	0.334	0	Epithelial cells	LTB	down
CCL4L2	0	-1.97768	0.174	0.397	0	Epithelial cells	CCL4L2	down
RGCC	0	-1.98134	0.077	0.334	0	Epithelial cells	RGCC	down
HCST	0	-2.02318	0.072	0.509	0	Epithelial cells	HCST	down
IGKC	0	-2.07616	0.203	0.363	0	Epithelial cells	IGKC	down
LAPTM5	0	-2.10229	0.044	0.526	0	Epithelial cells	LAPTM5	down
IFITM2	0	-2.11777	0.066	0.498	0	Epithelial cells	IFITM2	down
PTPRC	0	-2.12574	0.094	0.609	0	Epithelial cells	PTPRC	down
CD3D	0	-2.14797	0.057	0.436	0	Epithelial cells	CD3D	down
FCER1G	0	-2.1486	0.049	0.274	0	Epithelial cells	FCER1G	down
TRAC	0	-2.14886	0.058	0.412	0	Epithelial cells	TRAC	down
TSC22D3	0	-2.16856	0.239	0.64	0	Epithelial cells	TSC22D3	down
HLA-DPB1	0	-2.21698	0.293	0.581	0	Epithelial cells	HLA-DPB1	down
CCL3	0	-2.2707	0.099	0.307	0	Epithelial cells	CCL3	down
CCL5	0	-2.27894	0.166	0.451	0	Epithelial cells	CCL5	down
BTG1	0	-2.28567	0.38	0.797	0	Epithelial cells	BTG1	down
CD69	0	-2.31531	0.074	0.504	0	Epithelial cells	CD69	down
LYZ	0	-2.34717	0.07	0.25	0	Epithelial cells	LYZ	down
NKG7	0	-2.36489	0.084	0.326	0	Epithelial cells	NKG7	down
TYROBP	0	-2.4662	0.069	0.342	0	Epithelial cells	TYROBP	down
IL32	0	-2.50233	0.101	0.49	0	Epithelial cells	IL32	down
RGS1	0	-2.51764	0.086	0.504	0	Epithelial cells	RGS1	down
HLA-DRA	0	-2.56636	0.458	0.619	0	Epithelial cells	HLA-DRA	down
CD52	0	-2.87821	0.054	0.534	0	Epithelial cells	CD52	down
CCL4	0	-2.92348	0.185	0.511	0	Epithelial cells	CCL4	down
CXCR4	0	-3.10287	0.048	0.581	0	Epithelial cells	CXCR4	down
SRGN	0	-3.14511	0.085	0.72	0	Epithelial cells	SRGN	down
RAB11FIP1	8.1e-308	0.504562	0.298	0.155	2.73e-303	Epithelial cells	RAB11FIP1	up
GBAS	1.1e-307	0.345699	0.222	0.099	3.7e-303	Epithelial cells	GBAS	up
MVB12A	2.05e-307	0.295995	0.178	0.07	6.91e-303	Epithelial cells	MVB12A	up
SMIM19	4.26e-307	0.274645	0.265	0.126	1.44e-302	Epithelial cells	SMIM19	up
HOMER3	1.16e-306	0.302743	0.109	0.03	3.9e-302	Epithelial cells	HOMER3	up
CERS2	2.25e-306	0.334363	0.183	0.074	7.57e-302	Epithelial cells	CERS2	up
EPRS	5.27e-306	0.397836	0.247	0.117	1.78e-301	Epithelial cells	EPRS	up
RPL23	2.45e-305	-0.632353	0.647	0.684	8.26e-301	Epithelial cells	RPL23	down
CNIH4	2.46e-305	0.296087	0.252	0.117	8.27e-301	Epithelial cells	CNIH4	up
IL2RB	3.82e-305	-0.60799	0.012	0.104	1.29e-300	Epithelial cells	IL2RB	down
DDX1	5.79e-303	0.280854	0.217	0.095	1.95e-298	Epithelial cells	DDX1	up
SRP9	1.26e-302	0.399864	0.528	0.346	4.25e-298	Epithelial cells	SRP9	up
SRSF10	2.12e-302	0.338818	0.424	0.247	7.14e-298	Epithelial cells	SRSF10	up
PPP6R3	2.14e-302	0.274499	0.187	0.076	7.21e-298	Epithelial cells	PPP6R3	up
CAPN1	1.24e-301	0.382044	0.193	0.081	4.19e-297	Epithelial cells	CAPN1	up
RALGPS2	5.28e-301	0.418614	0.126	0.04	1.78e-296	Epithelial cells	RALGPS2	up
C10orf54	7.12e-301	-0.632877	0.074	0.195	2.4e-296	Epithelial cells	C10orf54	down
IDH1	1.2e-300	0.269206	0.157	0.058	4.05e-296	Epithelial cells	IDH1	up
NPTN	1.45e-300	0.317335	0.261	0.126	4.89e-296	Epithelial cells	NPTN	up
IP6K2	5.86e-300	0.25497	0.216	0.093	1.98e-295	Epithelial cells	IP6K2	up
PTRHD1	7.85e-300	0.31182	0.265	0.129	2.65e-295	Epithelial cells	PTRHD1	up
H3F3B	3.29e-299	-0.523905	0.896	0.913	1.11e-294	Epithelial cells	H3F3B	down
PREX1	1.35e-298	-0.498599	0.022	0.122	4.54e-294	Epithelial cells	PREX1	down
S100A11	3.87e-298	0.350163	0.901	0.705	1.31e-293	Epithelial cells	S100A11	up
RPL11	7.56e-298	-0.345777	0.959	0.956	2.55e-293	Epithelial cells	RPL11	down
MACF1	1.26e-297	0.281702	0.392	0.218	4.25e-293	Epithelial cells	MACF1	up
RCN1	1.49e-297	0.326702	0.137	0.047	5.01e-293	Epithelial cells	RCN1	up
DAB2	6.42e-297	-0.688858	0.018	0.112	2.16e-292	Epithelial cells	DAB2	down
SLIRP	6.49e-296	0.345561	0.432	0.255	2.19e-291	Epithelial cells	SLIRP	up
SVIP	1.13e-295	0.259761	0.299	0.148	3.79e-291	Epithelial cells	SVIP	up
VEZF1	1.61e-295	0.273772	0.176	0.07	5.43e-291	Epithelial cells	VEZF1	up
SRGAP1	3.37e-295	0.282292	0.127	0.041	1.14e-290	Epithelial cells	SRGAP1	up
ABLIM1	3.87e-295	0.277949	0.133	0.044	1.3e-290	Epithelial cells	ABLIM1	up
GTF2H5	1.08e-294	0.318533	0.354	0.194	3.62e-290	Epithelial cells	GTF2H5	up
CHI3L2	3.09e-294	0.353056	0.104	0.029	1.04e-289	Epithelial cells	CHI3L2	up
KDM5B	5.87e-294	0.278327	0.138	0.047	1.98e-289	Epithelial cells	KDM5B	up
ARL4A	8.39e-294	-0.807699	0.072	0.189	2.83e-289	Epithelial cells	ARL4A	down
NPM1	2.37e-293	0.368537	0.809	0.707	7.99e-289	Epithelial cells	NPM1	up
OXR1	9.6e-293	0.265904	0.18	0.073	3.23e-288	Epithelial cells	OXR1	up
VAPA	1.41e-292	0.385151	0.522	0.335	4.76e-288	Epithelial cells	VAPA	up
DERA	1.7e-292	0.299909	0.155	0.058	5.72e-288	Epithelial cells	DERA	up
SLC50A1	2.05e-292	0.306704	0.168	0.066	6.91e-288	Epithelial cells	SLC50A1	up
PKN2	2.27e-292	0.307381	0.263	0.128	7.66e-288	Epithelial cells	PKN2	up
INPP5D	2.68e-292	-0.457679	0.016	0.108	9.04e-288	Epithelial cells	INPP5D	down
GOLGA2	2.78e-291	0.260031	0.165	0.063	9.37e-287	Epithelial cells	GOLGA2	up
C5orf24	4.63e-291	0.266007	0.204	0.088	1.56e-286	Epithelial cells	C5orf24	up
CDK4	8.71e-291	0.299612	0.199	0.086	2.93e-286	Epithelial cells	CDK4	up
RAP1B	2.22e-290	-0.717077	0.187	0.314	7.5e-286	Epithelial cells	RAP1B	down
FBXO9	2.29e-289	0.271535	0.193	0.081	7.72e-285	Epithelial cells	FBXO9	up
BAG5	4.15e-289	0.302147	0.171	0.068	1.4e-284	Epithelial cells	BAG5	up
CSK	3.65e-288	-0.549061	0.051	0.162	1.23e-283	Epithelial cells	CSK	down
SGMS1	7.55e-288	0.281185	0.15	0.055	2.55e-283	Epithelial cells	SGMS1	up
MRPL17	1.95e-287	0.327835	0.189	0.08	6.58e-283	Epithelial cells	MRPL17	up
PPP1R35	5.2e-286	0.256207	0.167	0.065	1.75e-281	Epithelial cells	PPP1R35	up
NDUFV3	1.62e-285	0.309293	0.241	0.114	5.45e-281	Epithelial cells	NDUFV3	up
ARF6	2.9e-285	-0.752211	0.207	0.334	9.78e-281	Epithelial cells	ARF6	down
BANF1	3.28e-285	0.360818	0.451	0.277	1.1e-280	Epithelial cells	BANF1	up
CHCHD5	3.7e-285	0.305466	0.266	0.131	1.25e-280	Epithelial cells	CHCHD5	up
TOR1AIP2	4.38e-284	0.336111	0.202	0.089	1.48e-279	Epithelial cells	TOR1AIP2	up
DUSP23	6.65e-284	0.427049	0.256	0.128	2.24e-279	Epithelial cells	DUSP23	up
MMP24-AS1	8.99e-284	0.304551	0.224	0.103	3.03e-279	Epithelial cells	MMP24-AS1	up
RNF166	1.46e-283	-0.491101	0.023	0.117	4.9e-279	Epithelial cells	RNF166	down
RPS21	3.7e-283	-0.437635	0.85	0.854	1.25e-278	Epithelial cells	RPS21	down
OLA1	5.18e-283	0.311887	0.258	0.127	1.74e-278	Epithelial cells	OLA1	up
ITGAL	7.95e-283	-0.545053	0.013	0.101	2.68e-278	Epithelial cells	ITGAL	down
URI1	1.03e-282	0.302341	0.265	0.13	3.47e-278	Epithelial cells	URI1	up
DDX5	1.24e-282	-0.505062	0.689	0.729	4.18e-278	Epithelial cells	DDX5	down
KIAA1551	2.52e-282	-0.732716	0.132	0.26	8.5e-278	Epithelial cells	KIAA1551	down
TGFBR2	1.57e-281	-0.664982	0.046	0.153	5.28e-277	Epithelial cells	TGFBR2	down
MRFAP1	1.32e-280	0.279921	0.365	0.203	4.44e-276	Epithelial cells	MRFAP1	up
CCDC186	2.25e-280	0.294313	0.233	0.109	7.57e-276	Epithelial cells	CCDC186	up
PRKCH	3.72e-280	-0.567907	0.028	0.124	1.25e-275	Epithelial cells	PRKCH	down
LBR	1.14e-279	-0.532239	0.055	0.167	3.85e-275	Epithelial cells	LBR	down
NAA20	1.29e-279	0.285437	0.269	0.134	4.36e-275	Epithelial cells	NAA20	up
AP1S1	2.09e-279	0.290644	0.167	0.067	7.04e-275	Epithelial cells	AP1S1	up
GATAD1	2.72e-279	0.299507	0.155	0.06	9.15e-275	Epithelial cells	GATAD1	up
IFI27L2	4.31e-279	-0.636201	0.113	0.238	1.45e-274	Epithelial cells	IFI27L2	down
C1orf43	4.54e-279	0.362296	0.366	0.208	1.53e-274	Epithelial cells	C1orf43	up
COA4	4.86e-279	0.280145	0.248	0.119	1.64e-274	Epithelial cells	COA4	up
GAS6	2.96e-278	0.327322	0.202	0.091	9.96e-274	Epithelial cells	GAS6	up
MGAT4A	5.27e-278	-0.582019	0.054	0.162	1.78e-273	Epithelial cells	MGAT4A	down
IPO7	1.05e-277	0.296237	0.186	0.079	3.55e-273	Epithelial cells	IPO7	up
MANF	1.47e-277	0.321211	0.283	0.145	4.96e-273	Epithelial cells	MANF	up
SUDS3	3.44e-277	0.267178	0.184	0.077	1.16e-272	Epithelial cells	SUDS3	up
SEPT7	1.12e-276	-0.723039	0.421	0.509	3.77e-272	Epithelial cells	SEPT7	down
IGHG3	2.36e-276	-1.42021	0.014	0.101	7.94e-272	Epithelial cells	IGHG3	down
SBDS	2.53e-276	0.338341	0.394	0.225	8.54e-272	Epithelial cells	SBDS	up
ANAPC13	2.81e-276	0.250787	0.222	0.102	9.48e-272	Epithelial cells	ANAPC13	up
AGA	9.54e-276	0.27073	0.139	0.05	3.22e-271	Epithelial cells	AGA	up
POLR2L	1.26e-275	0.415943	0.609	0.458	4.24e-271	Epithelial cells	POLR2L	up
PTPRA	2.06e-275	0.273099	0.285	0.145	6.95e-271	Epithelial cells	PTPRA	up
TNFRSF18	2.07e-275	-0.86771	0.018	0.108	6.99e-271	Epithelial cells	TNFRSF18	down
CIRBP	7.8e-275	0.41306	0.654	0.533	2.63e-270	Epithelial cells	CIRBP	up
SORT1	2.96e-274	0.279851	0.12	0.04	9.96e-270	Epithelial cells	SORT1	up
KDELR2	5.66e-274	0.33493	0.35	0.196	1.91e-269	Epithelial cells	KDELR2	up
CBX5	1.4e-273	0.274593	0.228	0.107	4.71e-269	Epithelial cells	CBX5	up
DRAP1	2.01e-273	0.389751	0.58	0.393	6.76e-269	Epithelial cells	DRAP1	up
IL1B	2.7e-273	-1.41862	0.026	0.119	9.1e-269	Epithelial cells	IL1B	down
HNRNPA1	2.83e-273	-0.541973	0.665	0.697	9.54e-269	Epithelial cells	HNRNPA1	down
KMT5A	9.2e-273	0.268123	0.143	0.053	3.1e-268	Epithelial cells	KMT5A	up
NDUFB7	2.33e-271	0.332235	0.485	0.306	7.87e-267	Epithelial cells	NDUFB7	up
SUMO2	2.36e-271	0.363421	0.741	0.636	7.97e-267	Epithelial cells	SUMO2	up
STK10	4.07e-271	-0.487322	0.016	0.103	1.37e-266	Epithelial cells	STK10	down
PPP4R1	8.06e-271	0.253753	0.12	0.04	2.71e-266	Epithelial cells	PPP4R1	up
ATP2A2	5.67e-270	0.264556	0.176	0.074	1.91e-265	Epithelial cells	ATP2A2	up
PLEKHA3	5.9e-270	0.294489	0.192	0.084	1.99e-265	Epithelial cells	PLEKHA3	up
RPN1	8.75e-270	0.298573	0.23	0.109	2.95e-265	Epithelial cells	RPN1	up
TYMP	1.56e-268	-0.939574	0.195	0.318	5.24e-264	Epithelial cells	TYMP	down
CTLA4	5.78e-267	-0.641258	0.015	0.101	1.95e-262	Epithelial cells	CTLA4	down
AES	3.44e-266	0.323494	0.513	0.327	1.16e-261	Epithelial cells	AES	up
PPP1R21	5.65e-266	0.262538	0.126	0.044	1.9e-261	Epithelial cells	PPP1R21	up
DEF6	6.5e-266	-0.44911	0.019	0.106	2.19e-261	Epithelial cells	DEF6	down
TM9SF2	5.78e-265	0.277477	0.318	0.172	1.95e-260	Epithelial cells	TM9SF2	up
IGHA1	6.47e-265	-1.72863	0.035	0.136	2.18e-260	Epithelial cells	IGHA1	down
PNISR	8.2e-265	0.335397	0.555	0.374	2.76e-260	Epithelial cells	PNISR	up
TCEB2	8.21e-265	0.384188	0.676	0.521	2.77e-260	Epithelial cells	TCEB2	up
PDXDC1	1.6e-264	0.267814	0.144	0.054	5.41e-260	Epithelial cells	PDXDC1	up
CST3	1.29e-263	-0.490111	0.726	0.407	4.35e-259	Epithelial cells	CST3	down
MTHFD2	2.72e-263	-0.48304	0.03	0.125	9.15e-259	Epithelial cells	MTHFD2	down
GLS	4.83e-263	0.477512	0.31	0.174	1.63e-258	Epithelial cells	GLS	up
ASPH	6.38e-263	0.272876	0.174	0.073	2.15e-258	Epithelial cells	ASPH	up
SMARCA4	1.48e-262	0.301992	0.141	0.053	5e-258	Epithelial cells	SMARCA4	up
FMNL2	2.82e-262	0.301393	0.118	0.04	9.51e-258	Epithelial cells	FMNL2	up
ATP5G1	5.86e-262	0.328439	0.412	0.246	1.97e-257	Epithelial cells	ATP5G1	up
MYDGF	2.22e-261	0.297607	0.373	0.214	7.49e-257	Epithelial cells	MYDGF	up
HACD1	2.52e-261	0.266905	0.101	0.03	8.49e-257	Epithelial cells	HACD1	up
ARFGEF1	6.87e-261	0.300464	0.2	0.09	2.31e-256	Epithelial cells	ARFGEF1	up
LINC01420	9.07e-261	0.272418	0.351	0.198	3.06e-256	Epithelial cells	LINC01420	up
SSFA2	1.15e-259	0.282364	0.15	0.059	3.87e-255	Epithelial cells	SSFA2	up
RPL4	3.12e-258	-0.587678	0.64	0.672	1.05e-253	Epithelial cells	RPL4	down
FGD5-AS1	3.51e-258	0.272125	0.212	0.099	1.18e-253	Epithelial cells	FGD5-AS1	up
IER3IP1	3.78e-258	0.256575	0.313	0.169	1.27e-253	Epithelial cells	IER3IP1	up
CLSTN1	6.01e-258	0.283225	0.175	0.074	2.02e-253	Epithelial cells	CLSTN1	up
USO1	8.07e-258	0.280089	0.194	0.087	2.72e-253	Epithelial cells	USO1	up
MAP3K5	6.53e-257	0.276933	0.119	0.041	2.2e-252	Epithelial cells	MAP3K5	up
SF3B6	5.48e-256	0.331587	0.492	0.321	1.85e-251	Epithelial cells	SF3B6	up
TMEM147	2.19e-253	0.285036	0.308	0.168	7.37e-249	Epithelial cells	TMEM147	up
C17orf89	1.08e-252	0.273245	0.299	0.16	3.65e-248	Epithelial cells	C17orf89	up
HSD17B11	1.58e-252	-0.59507	0.07	0.174	5.31e-248	Epithelial cells	HSD17B11	down
RNASET2	2.15e-252	-0.732748	0.205	0.318	7.25e-248	Epithelial cells	RNASET2	down
AKNA	7.86e-252	-0.550399	0.038	0.133	2.65e-247	Epithelial cells	AKNA	down
PXK	3.01e-251	0.285465	0.137	0.052	1.01e-246	Epithelial cells	PXK	up
GLRX5	4.4e-251	0.254757	0.239	0.118	1.48e-246	Epithelial cells	GLRX5	up
GBP5	1.71e-249	-0.596711	0.028	0.12	5.76e-245	Epithelial cells	GBP5	down
NARS	5.47e-249	0.321297	0.268	0.14	1.84e-244	Epithelial cells	NARS	up
PECAM1	6.24e-249	-0.694187	0.018	0.101	2.1e-244	Epithelial cells	PECAM1	down
GNLY	6.79e-249	-2.24791	0.06	0.159	2.29e-244	Epithelial cells	GNLY	down
NDUFB9	7.99e-249	0.359699	0.43	0.266	2.69e-244	Epithelial cells	NDUFB9	up
PHF3	1.08e-248	0.265113	0.315	0.173	3.64e-244	Epithelial cells	PHF3	up
HDGF	4.6e-248	0.29478	0.201	0.093	1.55e-243	Epithelial cells	HDGF	up
LARP1	8.41e-248	0.262899	0.197	0.09	2.84e-243	Epithelial cells	LARP1	up
UQCRQ	1.27e-247	0.358169	0.55	0.38	4.29e-243	Epithelial cells	UQCRQ	up
SLC2A3	7.57e-247	-0.626618	0.081	0.193	2.55e-242	Epithelial cells	SLC2A3	down
NDUFB10	1.71e-246	0.313332	0.431	0.265	5.78e-242	Epithelial cells	NDUFB10	up
SPG20	2.03e-246	0.257432	0.148	0.059	6.85e-242	Epithelial cells	SPG20	up
IRF1	2.19e-246	-0.657172	0.11	0.23	7.39e-242	Epithelial cells	IRF1	down
AP000769.1	9.17e-246	0.32459	0.11	0.037	3.09e-241	Epithelial cells	AP000769.1	up
ARPC3	2.79e-245	-0.515664	0.573	0.611	9.4e-241	Epithelial cells	ARPC3	down
TOP1	1.14e-244	0.355925	0.314	0.177	3.83e-240	Epithelial cells	TOP1	up
NDUFB11	2.99e-244	0.354873	0.529	0.362	1.01e-239	Epithelial cells	NDUFB11	up
RP11-138A9.1	4.2e-244	-0.658558	0.029	0.115	1.41e-239	Epithelial cells	RP11-138A9.1	down
NDUFS8	4.3e-244	0.36629	0.379	0.226	1.45e-239	Epithelial cells	NDUFS8	up
LGALS9	6.38e-244	-0.424442	0.032	0.123	2.15e-239	Epithelial cells	LGALS9	down
CAPN2	4.79e-243	0.414852	0.289	0.159	1.61e-238	Epithelial cells	CAPN2	up
CLINT1	7.49e-243	0.338197	0.257	0.135	2.52e-238	Epithelial cells	CLINT1	up
YWHAH	1.4e-241	-0.998661	0.205	0.316	4.72e-237	Epithelial cells	YWHAH	down
MLF2	6.98e-241	0.268723	0.282	0.15	2.35e-236	Epithelial cells	MLF2	up
AKT2	3.7e-240	0.252063	0.126	0.046	1.25e-235	Epithelial cells	AKT2	up
LTBR	4.97e-240	0.275488	0.11	0.038	1.67e-235	Epithelial cells	LTBR	up
FABP5	8.52e-240	-0.854212	0.087	0.197	2.87e-235	Epithelial cells	FABP5	down
P4HB	3.32e-239	0.285799	0.367	0.215	1.12e-234	Epithelial cells	P4HB	up
LAMP1	3.33e-239	0.291678	0.341	0.194	1.12e-234	Epithelial cells	LAMP1	up
CDC42SE2	4.95e-239	-0.731754	0.177	0.288	1.67e-234	Epithelial cells	CDC42SE2	down
TMEM134	5.36e-239	0.263565	0.235	0.117	1.8e-234	Epithelial cells	TMEM134	up
STOML2	1.95e-238	0.266897	0.24	0.121	6.57e-234	Epithelial cells	STOML2	up
SRRM2	3.03e-237	0.27021	0.571	0.387	1.02e-232	Epithelial cells	SRRM2	up
MRPS21	3.78e-237	0.327282	0.489	0.319	1.27e-232	Epithelial cells	MRPS21	up
FAM65B	1.93e-236	-0.62252	0.049	0.144	6.49e-232	Epithelial cells	FAM65B	down
DCK	2.21e-236	-0.512861	0.053	0.149	7.43e-232	Epithelial cells	DCK	down
DOCK10	6.2e-236	-0.463385	0.038	0.129	2.09e-231	Epithelial cells	DOCK10	down
RASSF5	1.38e-235	-0.504615	0.048	0.144	4.64e-231	Epithelial cells	RASSF5	down
IGBP1	2.67e-235	0.293763	0.287	0.156	9e-231	Epithelial cells	IGBP1	up
MCUR1	7.13e-235	0.257309	0.159	0.068	2.4e-230	Epithelial cells	MCUR1	up
FAM105A	1.56e-233	-0.472908	0.029	0.113	5.25e-229	Epithelial cells	FAM105A	down
HMGN2	2.07e-232	0.320334	0.628	0.493	6.97e-228	Epithelial cells	HMGN2	up
ACTR2	4.91e-232	-0.599229	0.245	0.358	1.65e-227	Epithelial cells	ACTR2	down
KRTCAP2	9.87e-232	0.322869	0.442	0.281	3.33e-227	Epithelial cells	KRTCAP2	up
SRSF7	1.42e-231	-0.680825	0.424	0.505	4.79e-227	Epithelial cells	SRSF7	down
RPS13	1.47e-231	-0.33352	0.913	0.911	4.96e-227	Epithelial cells	RPS13	down
BLVRB	3.21e-231	0.2584	0.226	0.113	1.08e-226	Epithelial cells	BLVRB	up
CAP1	1.99e-230	-0.599934	0.308	0.411	6.69e-226	Epithelial cells	CAP1	down
RPS19BP1	2.18e-230	0.259727	0.354	0.207	7.33e-226	Epithelial cells	RPS19BP1	up
H1F0	4.09e-230	0.341561	0.141	0.057	1.38e-225	Epithelial cells	H1F0	up
SYNCRIP	5.75e-230	0.283677	0.289	0.159	1.94e-225	Epithelial cells	SYNCRIP	up
SMS	8.92e-230	0.295073	0.311	0.176	3e-225	Epithelial cells	SMS	up
SEMA4D	2.83e-228	-0.511538	0.039	0.128	9.53e-224	Epithelial cells	SEMA4D	down
FAM107B	7.84e-227	-0.511114	0.098	0.211	2.64e-222	Epithelial cells	FAM107B	down
GLTP	1.7e-226	0.274102	0.203	0.098	5.74e-222	Epithelial cells	GLTP	up
SEC11C	3.75e-226	0.251678	0.337	0.194	1.26e-221	Epithelial cells	SEC11C	up
DNAJB4	8.81e-225	0.319464	0.189	0.089	2.97e-220	Epithelial cells	DNAJB4	up
PDLIM2	3.59e-224	-0.479672	0.039	0.127	1.21e-219	Epithelial cells	PDLIM2	down
TXNDC17	1.32e-223	0.312825	0.365	0.22	4.44e-219	Epithelial cells	TXNDC17	up
VOPP1	2.86e-223	-0.476521	0.043	0.132	9.62e-219	Epithelial cells	VOPP1	down
TAP1	6.54e-223	-0.491201	0.072	0.175	2.2e-218	Epithelial cells	TAP1	down
GRINA	6.2e-222	0.264233	0.228	0.117	2.09e-217	Epithelial cells	GRINA	up
CCNG1	7.96e-222	0.251635	0.21	0.103	2.68e-217	Epithelial cells	CCNG1	up
MDM2	2.23e-221	0.332971	0.189	0.09	7.53e-217	Epithelial cells	MDM2	up
MRPL3	5.18e-221	0.268194	0.232	0.119	1.74e-216	Epithelial cells	MRPL3	up
SLC25A3	5.19e-221	0.330883	0.619	0.463	1.75e-216	Epithelial cells	SLC25A3	up
AK2	7.19e-221	0.280241	0.217	0.11	2.42e-216	Epithelial cells	AK2	up
PKM	1.9e-220	0.366874	0.54	0.369	6.39e-216	Epithelial cells	PKM	up
TNFAIP8	8.56e-220	-0.603389	0.121	0.227	2.89e-215	Epithelial cells	TNFAIP8	down
RPL6	1.53e-219	-0.345148	0.861	0.868	5.17e-215	Epithelial cells	RPL6	down
ADAM9	2.08e-219	0.255571	0.128	0.051	7.02e-215	Epithelial cells	ADAM9	up
NUMA1	2.16e-219	0.256064	0.181	0.085	7.27e-215	Epithelial cells	NUMA1	up
VASP	8.61e-219	-0.53506	0.089	0.192	2.9e-214	Epithelial cells	VASP	down
TGFBI	1.07e-217	-0.502799	0.024	0.103	3.59e-213	Epithelial cells	TGFBI	down
RPS23	6.6e-217	-0.300577	0.958	0.949	2.22e-212	Epithelial cells	RPS23	down
RPL26	2.54e-216	-0.34024	0.931	0.914	8.55e-212	Epithelial cells	RPL26	down
PNRC1	2.57e-216	-0.621798	0.458	0.525	8.67e-212	Epithelial cells	PNRC1	down
SLC43A3	1.45e-215	0.35505	0.11	0.041	4.88e-211	Epithelial cells	SLC43A3	up
MTRNR2L8	2.03e-215	0.281018	0.189	0.091	6.83e-211	Epithelial cells	MTRNR2L8	up
RNF187	3.73e-215	0.34865	0.257	0.139	1.26e-210	Epithelial cells	RNF187	up
ATF3	8.33e-215	0.605741	0.285	0.169	2.81e-210	Epithelial cells	ATF3	up
SOCS1	1.34e-213	-0.634529	0.097	0.201	4.52e-209	Epithelial cells	SOCS1	down
SEC22B	1.94e-213	0.292645	0.221	0.114	6.53e-209	Epithelial cells	SEC22B	up
PLAU	5.05e-213	0.528825	0.18	0.089	1.7e-208	Epithelial cells	PLAU	up
SEPT2	5.42e-213	0.26383	0.391	0.241	1.83e-208	Epithelial cells	SEPT2	up
2024-09-15	1.5e-212	0.310783	0.487	0.329	5.07e-208	Epithelial cells	2024-09-15	up
CHMP2B	5.1e-212	0.254453	0.235	0.123	1.72e-207	Epithelial cells	CHMP2B	up
KIF5B	1.79e-211	0.281372	0.391	0.241	6.02e-207	Epithelial cells	KIF5B	up
RAB8B	1.79e-211	-0.504361	0.062	0.156	6.03e-207	Epithelial cells	RAB8B	down
PHB	2.66e-211	0.264444	0.306	0.176	8.96e-207	Epithelial cells	PHB	up
SUN2	1.69e-210	-0.507803	0.042	0.128	5.71e-206	Epithelial cells	SUN2	down
TUBA1B	4.12e-209	-0.859429	0.354	0.429	1.39e-204	Epithelial cells	TUBA1B	down
WDR83OS	8.54e-209	0.308292	0.506	0.348	2.88e-204	Epithelial cells	WDR83OS	up
TMBIM4	2.28e-208	0.285597	0.443	0.289	7.68e-204	Epithelial cells	TMBIM4	up
MRPL20	3.62e-208	0.278319	0.413	0.261	1.22e-203	Epithelial cells	MRPL20	up
FOXN3	6.07e-208	-0.471357	0.057	0.148	2.04e-203	Epithelial cells	FOXN3	down
CH17-373J23.1	1.68e-206	-0.56982	0.027	0.103	5.66e-202	Epithelial cells	CH17-373J23.1	down
TMEM123	2.08e-206	0.296943	0.418	0.266	7e-202	Epithelial cells	TMEM123	up
COPB1	2.2e-206	0.253124	0.263	0.144	7.4e-202	Epithelial cells	COPB1	up
TGFB1	2.58e-204	-0.5806	0.099	0.198	8.69e-200	Epithelial cells	TGFB1	down
GBP4	2.53e-203	-0.407109	0.03	0.109	8.51e-199	Epithelial cells	GBP4	down
SLC39A1	2.21e-202	0.261801	0.163	0.076	7.45e-198	Epithelial cells	SLC39A1	up
DYNC1H1	1.24e-201	0.250781	0.264	0.146	4.16e-197	Epithelial cells	DYNC1H1	up
CSNK1A1	6.59e-201	0.267478	0.422	0.269	2.22e-196	Epithelial cells	CSNK1A1	up
SAMD9	6.66e-201	-0.523668	0.077	0.174	2.24e-196	Epithelial cells	SAMD9	down
TPM3	5.19e-200	-0.524363	0.409	0.49	1.75e-195	Epithelial cells	TPM3	down
PIK3IP1	6.75e-199	-0.64989	0.11	0.206	2.27e-194	Epithelial cells	PIK3IP1	down
DSC2	2.23e-198	0.389786	0.109	0.042	7.51e-194	Epithelial cells	DSC2	up
APH1A	2.42e-198	0.293827	0.283	0.162	8.14e-194	Epithelial cells	APH1A	up
SDCCAG8	2.5e-198	0.283951	0.203	0.105	8.41e-194	Epithelial cells	SDCCAG8	up
EZR	6.11e-198	0.281013	0.542	0.369	2.06e-193	Epithelial cells	EZR	up
TTC39C	8.45e-198	-0.418523	0.03	0.107	2.85e-193	Epithelial cells	TTC39C	down
BTN3A2	2.13e-197	-0.490878	0.05	0.134	7.18e-193	Epithelial cells	BTN3A2	down
CARD8	7.3e-197	-0.410547	0.036	0.115	2.46e-192	Epithelial cells	CARD8	down
C11orf31	2.33e-196	0.294991	0.514	0.354	7.84e-192	Epithelial cells	C11orf31	up
CASP8	1.13e-195	-0.464702	0.042	0.123	3.8e-191	Epithelial cells	CASP8	down
ZNF217	2.85e-195	0.361941	0.167	0.081	9.62e-191	Epithelial cells	ZNF217	up
IARS2	5.81e-195	0.310341	0.175	0.086	1.96e-190	Epithelial cells	IARS2	up
ARPC4	1.61e-192	-0.556305	0.185	0.286	5.42e-188	Epithelial cells	ARPC4	down
IVNS1ABP	4.99e-192	-0.635711	0.102	0.198	1.68e-187	Epithelial cells	IVNS1ABP	down
CMTM3	5.69e-192	-0.43495	0.04	0.119	1.92e-187	Epithelial cells	CMTM3	down
GTF3A	8.14e-192	-0.517251	0.191	0.294	2.74e-187	Epithelial cells	GTF3A	down
DBI	9.29e-192	0.370925	0.585	0.441	3.13e-187	Epithelial cells	DBI	up
CAPZB	3.14e-191	-0.548365	0.328	0.415	1.06e-186	Epithelial cells	CAPZB	down
MYADM	4.6e-191	-0.65359	0.087	0.18	1.55e-186	Epithelial cells	MYADM	down
COX7C	9.85e-191	0.282111	0.793	0.741	3.32e-186	Epithelial cells	COX7C	up
TNFSF10	1.31e-189	-0.45168	0.075	0.173	4.4e-185	Epithelial cells	TNFSF10	down
CKLF	3.47e-189	-0.6963	0.291	0.378	1.17e-184	Epithelial cells	CKLF	down
HM13	5.59e-189	0.250753	0.278	0.16	1.88e-184	Epithelial cells	HM13	up
SRP14	1.07e-188	0.257281	0.779	0.712	3.6e-184	Epithelial cells	SRP14	up
CD8B	1.65e-188	-0.775253	0.045	0.123	5.58e-184	Epithelial cells	CD8B	down
SEC61G	2.01e-187	0.348511	0.598	0.465	6.78e-183	Epithelial cells	SEC61G	up
EPSTI1	7.72e-187	-0.479445	0.084	0.181	2.6e-182	Epithelial cells	EPSTI1	down
LYAR	1.28e-184	-0.489004	0.041	0.118	4.3e-180	Epithelial cells	LYAR	down
CCDC88A	1.21e-183	-0.377446	0.029	0.102	4.09e-179	Epithelial cells	CCDC88A	down
ILF2	2.29e-183	0.290172	0.307	0.184	7.73e-179	Epithelial cells	ILF2	up
APEX1	3.17e-183	0.266274	0.326	0.198	1.07e-178	Epithelial cells	APEX1	up
HGSNAT	1.44e-182	0.255759	0.137	0.062	4.85e-178	Epithelial cells	HGSNAT	up
LGALS1	2.44e-182	-0.768473	0.545	0.589	8.23e-178	Epithelial cells	LGALS1	down
LRRFIP1	8.23e-176	-0.52164	0.261	0.361	2.77e-171	Epithelial cells	LRRFIP1	down
HACD4	1.27e-175	-0.390804	0.041	0.115	4.27e-171	Epithelial cells	HACD4	down
SLC9A3R1	1.38e-173	-0.443451	0.031	0.1	4.65e-169	Epithelial cells	SLC9A3R1	down
NDUFB4	5.96e-172	0.263282	0.502	0.349	2.01e-167	Epithelial cells	NDUFB4	up
SPCS2	2.57e-170	0.255308	0.551	0.404	8.64e-166	Epithelial cells	SPCS2	up
GBP3	2.3e-169	0.261781	0.138	0.064	7.75e-165	Epithelial cells	GBP3	up
SKAP2	6.46e-169	-0.392104	0.055	0.134	2.18e-164	Epithelial cells	SKAP2	down
SAMD9L	1.23e-168	-0.502973	0.069	0.153	4.16e-164	Epithelial cells	SAMD9L	down
RP11-160E2.6	5.81e-168	-0.535555	0.052	0.128	1.96e-163	Epithelial cells	RP11-160E2.6	down
RASSF4	1.53e-167	0.258589	0.208	0.114	5.14e-163	Epithelial cells	RASSF4	up
FNBP1	3.64e-167	-0.553775	0.156	0.25	1.23e-162	Epithelial cells	FNBP1	down
UQCR10	9.81e-167	0.284467	0.595	0.454	3.3e-162	Epithelial cells	UQCR10	up
ELF1	2.36e-166	-0.633403	0.269	0.351	7.95e-162	Epithelial cells	ELF1	down
RP11-1143G9.4	4.32e-166	-0.630051	0.032	0.102	1.46e-161	Epithelial cells	RP11-1143G9.4	down
IGFBP7	4.89e-165	-1.0718	0.298	0.171	1.65e-160	Epithelial cells	IGFBP7	down
MARCKS	1.59e-164	-0.904589	0.116	0.201	5.35e-160	Epithelial cells	MARCKS	down
SPARCL1	5.95e-164	-2.31863	0.036	0.102	2.01e-159	Epithelial cells	SPARCL1	down
VDAC2	6.09e-161	0.261866	0.376	0.245	2.05e-156	Epithelial cells	VDAC2	up
RPS8	2.64e-160	-0.299302	0.955	0.933	8.89e-156	Epithelial cells	RPS8	down
ABRACL	1.3e-159	-0.552873	0.213	0.299	4.39e-155	Epithelial cells	ABRACL	down
FAM96B	1.19e-157	0.25297	0.444	0.302	4.01e-153	Epithelial cells	FAM96B	up
RPL36	5.28e-157	-0.304798	0.922	0.915	1.78e-152	Epithelial cells	RPL36	down
REL	6.31e-157	-0.517054	0.164	0.259	2.13e-152	Epithelial cells	REL	down
CXCL2	1.04e-156	0.435824	0.136	0.066	3.51e-152	Epithelial cells	CXCL2	up
RALBP1	6.95e-156	0.263027	0.23	0.133	2.34e-151	Epithelial cells	RALBP1	up
SYTL3	5.01e-155	-0.506998	0.045	0.113	1.69e-150	Epithelial cells	SYTL3	down
DDX39A	9.45e-155	-0.394994	0.049	0.12	3.18e-150	Epithelial cells	DDX39A	down
RNF149	1.64e-154	-0.469383	0.09	0.172	5.54e-150	Epithelial cells	RNF149	down
ZNF331	2.16e-154	-0.638896	0.071	0.147	7.27e-150	Epithelial cells	ZNF331	down
APOBEC3C	2.39e-154	-0.529076	0.081	0.163	8.06e-150	Epithelial cells	APOBEC3C	down
LIMS1	3.18e-154	-0.534899	0.138	0.227	1.07e-149	Epithelial cells	LIMS1	down
NR3C1	1.7e-153	-0.566213	0.143	0.231	5.73e-149	Epithelial cells	NR3C1	down
PSME2	1.52e-152	-0.545485	0.306	0.383	5.11e-148	Epithelial cells	PSME2	down
PRPF38B	1.08e-151	-0.556643	0.184	0.27	3.65e-147	Epithelial cells	PRPF38B	down
VMP1	8.53e-150	0.369653	0.391	0.271	2.87e-145	Epithelial cells	VMP1	up
SNHG15	1.12e-149	-0.458685	0.054	0.124	3.76e-145	Epithelial cells	SNHG15	down
JAK1	2.03e-149	-0.580226	0.256	0.339	6.86e-145	Epithelial cells	JAK1	down
OGFRL1	2.47e-149	-0.401118	0.055	0.129	8.33e-145	Epithelial cells	OGFRL1	down
NBEAL1	6.35e-148	-0.655147	0.163	0.242	2.14e-143	Epithelial cells	NBEAL1	down
PCSK7	9.83e-148	-0.457032	0.065	0.139	3.31e-143	Epithelial cells	PCSK7	down
PSME1	1.66e-146	-0.462841	0.445	0.498	5.59e-142	Epithelial cells	PSME1	down
CD14	3.01e-146	-0.887908	0.068	0.141	1.01e-141	Epithelial cells	CD14	down
IDI1	8.69e-144	-0.535736	0.088	0.164	2.93e-139	Epithelial cells	IDI1	down
CAST	1.92e-143	0.323087	0.453	0.318	6.47e-139	Epithelial cells	CAST	up
CNPY3	6.16e-143	-0.488843	0.113	0.193	2.08e-138	Epithelial cells	CNPY3	down
ALDOA	1.1e-142	0.319788	0.643	0.503	3.69e-138	Epithelial cells	ALDOA	up
BIN1	5.6e-142	-0.425608	0.06	0.13	1.89e-137	Epithelial cells	BIN1	down
COX5B	1.44e-141	0.264663	0.656	0.525	4.84e-137	Epithelial cells	COX5B	up
XAF1	3.86e-141	-0.374648	0.087	0.172	1.3e-136	Epithelial cells	XAF1	down
RAP1A	4.87e-140	-0.495432	0.209	0.289	1.64e-135	Epithelial cells	RAP1A	down
IFNG	2.36e-139	-0.820751	0.047	0.115	7.94e-135	Epithelial cells	IFNG	down
IGLC2	4.39e-139	-2.63274	0.074	0.154	1.48e-134	Epithelial cells	IGLC2	down
TCF4	4.95e-137	-0.62396	0.056	0.122	1.67e-132	Epithelial cells	TCF4	down
UBE2L6	6.47e-137	-0.405274	0.106	0.187	2.18e-132	Epithelial cells	UBE2L6	down
PGK1	2.66e-136	-0.488575	0.302	0.373	8.97e-132	Epithelial cells	PGK1	down
SLC16A3	3.11e-136	-0.360963	0.045	0.11	1.05e-131	Epithelial cells	SLC16A3	down
POLD4	6.25e-136	-0.394105	0.045	0.108	2.11e-131	Epithelial cells	POLD4	down
IGHG1	4.35e-135	-1.77718	0.037	0.1	1.47e-130	Epithelial cells	IGHG1	down
CYCS	6.81e-135	-0.548758	0.315	0.381	2.29e-130	Epithelial cells	CYCS	down
BNIP2	2.68e-134	-0.414559	0.09	0.166	9.04e-130	Epithelial cells	BNIP2	down
ST8SIA4	5.1e-134	-0.288197	0.039	0.102	1.72e-129	Epithelial cells	ST8SIA4	down
SH3BGRL	7.71e-134	-0.534884	0.348	0.402	2.6e-129	Epithelial cells	SH3BGRL	down
MX2	8.07e-134	-0.300481	0.038	0.102	2.72e-129	Epithelial cells	MX2	down
DAZAP2	1.1e-133	-0.509467	0.249	0.324	3.71e-129	Epithelial cells	DAZAP2	down
YPEL5	3.38e-133	-0.821974	0.272	0.333	1.14e-128	Epithelial cells	YPEL5	down
IDH2	1.74e-132	-0.402578	0.066	0.136	5.87e-128	Epithelial cells	IDH2	down
CAPZA1	1.4e-131	-0.500284	0.239	0.316	4.71e-127	Epithelial cells	CAPZA1	down
CCDC167	3.4e-131	-0.375937	0.046	0.109	1.15e-126	Epithelial cells	CCDC167	down
PSMB10	5.29e-131	-0.333118	0.049	0.114	1.78e-126	Epithelial cells	PSMB10	down
CSRNP1	5.38e-131	-0.449306	0.051	0.115	1.81e-126	Epithelial cells	CSRNP1	down
ELOVL5	1.66e-130	-0.399985	0.068	0.138	5.59e-126	Epithelial cells	ELOVL5	down
RNF213	2.76e-130	-0.618074	0.28	0.36	9.29e-126	Epithelial cells	RNF213	down
DDIT4	6.76e-130	-0.376391	0.22	0.319	2.28e-125	Epithelial cells	DDIT4	down
NFKBIZ	1.38e-128	0.272783	0.275	0.179	4.67e-124	Epithelial cells	NFKBIZ	up
CLIC1	5.6e-127	-0.385467	0.612	0.622	1.89e-122	Epithelial cells	CLIC1	down
ADRBK1	3.09e-125	-0.368449	0.058	0.125	1.04e-120	Epithelial cells	ADRBK1	down
RASGEF1B	6.85e-125	-0.461975	0.055	0.121	2.31e-120	Epithelial cells	RASGEF1B	down
RBMS1	2.18e-124	-0.440699	0.083	0.152	7.34e-120	Epithelial cells	RBMS1	down
SNRPD2	2.6e-124	-0.5132	0.401	0.447	8.75e-120	Epithelial cells	SNRPD2	down
EIF4EBP1	3.04e-124	-0.265615	0.04	0.1	1.03e-119	Epithelial cells	EIF4EBP1	down
RAB32	1.52e-123	-0.34691	0.05	0.113	5.11e-119	Epithelial cells	RAB32	down
HN1	4.68e-123	-0.429632	0.171	0.253	1.58e-118	Epithelial cells	HN1	down
TNFSF12	2.12e-122	-0.321956	0.048	0.11	7.14e-118	Epithelial cells	TNFSF12	down
MGP	2.81e-122	-1.12946	0.222	0.126	9.46e-118	Epithelial cells	MGP	down
UBC	4.45e-121	-0.250246	0.752	0.783	1.5e-116	Epithelial cells	UBC	down
ZC3HAV1	2.73e-120	-0.5171	0.121	0.194	9.19e-116	Epithelial cells	ZC3HAV1	down
LYSMD2	3.48e-118	-0.326163	0.074	0.142	1.17e-113	Epithelial cells	LYSMD2	down
PAIP2	3.25e-116	-0.512368	0.257	0.322	1.09e-111	Epithelial cells	PAIP2	down
TSPAN14	1.44e-115	-0.362072	0.071	0.137	4.86e-111	Epithelial cells	TSPAN14	down
LDLRAD4	1.53e-115	-0.505932	0.055	0.114	5.17e-111	Epithelial cells	LDLRAD4	down
UQCRB	4.06e-114	-0.372495	0.649	0.665	1.37e-109	Epithelial cells	UQCRB	down
MIS18BP1	1.78e-113	-0.412922	0.083	0.151	6e-109	Epithelial cells	MIS18BP1	down
RHOF	1.75e-111	-0.349318	0.074	0.139	5.9e-107	Epithelial cells	RHOF	down
GRB2	3.74e-111	-0.434628	0.17	0.244	1.26e-106	Epithelial cells	GRB2	down
TAGLN2	1.82e-110	-0.376145	0.393	0.46	6.13e-106	Epithelial cells	TAGLN2	down
ANKRD12	2.32e-110	-0.510983	0.269	0.333	7.83e-106	Epithelial cells	ANKRD12	down
CDC42	2.64e-110	-0.404187	0.58	0.593	8.89e-106	Epithelial cells	CDC42	down
PAG1	1.83e-109	-0.371588	0.051	0.11	6.16e-105	Epithelial cells	PAG1	down
BCL2	2.89e-109	-0.376342	0.069	0.132	9.75e-105	Epithelial cells	BCL2	down
TLE4	4.13e-108	-0.425461	0.063	0.122	1.39e-103	Epithelial cells	TLE4	down
TNFRSF14	6.29e-108	-0.345781	0.089	0.157	2.12e-103	Epithelial cells	TNFRSF14	down
PLIN2	1.99e-107	-0.452522	0.072	0.133	6.71e-103	Epithelial cells	PLIN2	down
IRF7	6.04e-107	-0.453975	0.075	0.138	2.03e-102	Epithelial cells	IRF7	down
FAM129A	6.6e-107	-0.322406	0.057	0.118	2.22e-102	Epithelial cells	FAM129A	down
RP11-138A9.2	7.36e-107	-0.502375	0.054	0.11	2.48e-102	Epithelial cells	RP11-138A9.2	down
PRKACB	3.51e-106	-0.373722	0.059	0.117	1.18e-101	Epithelial cells	PRKACB	down
TMA7	1.4e-105	-0.289284	0.71	0.738	4.72e-101	Epithelial cells	TMA7	down
SLC4A7	8.77e-105	-0.35878	0.071	0.133	2.95e-100	Epithelial cells	SLC4A7	down
TRIM22	3.91e-104	-0.410494	0.145	0.219	1.32e-99	Epithelial cells	TRIM22	down
NAMPT	9.77e-103	-0.663387	0.15	0.22	3.29e-98	Epithelial cells	NAMPT	down
CYTH1	6.79e-102	-0.362341	0.073	0.134	2.29e-97	Epithelial cells	CYTH1	down
YBX1	4.08e-101	-0.311841	0.643	0.638	1.37e-96	Epithelial cells	YBX1	down
GLTSCR2	2.51e-100	-0.544618	0.398	0.432	8.45e-96	Epithelial cells	GLTSCR2	down
MGAT1	1.75e-99	-0.413215	0.09	0.152	5.9e-95	Epithelial cells	MGAT1	down
TWF2	7.11e-99	-0.353078	0.092	0.155	2.39e-94	Epithelial cells	TWF2	down
BUB3	1.96e-98	-0.470683	0.15	0.214	6.59e-94	Epithelial cells	BUB3	down
LITAF	1.33e-97	-0.601072	0.314	0.357	4.47e-93	Epithelial cells	LITAF	down
AIM1	1.26e-95	-0.357716	0.059	0.113	4.23e-91	Epithelial cells	AIM1	down
CDKN1A	4.24e-95	0.28972	0.215	0.141	1.43e-90	Epithelial cells	CDKN1A	up
SNRPB	5.53e-94	-0.414872	0.24	0.302	1.86e-89	Epithelial cells	SNRPB	down
GNAI2	3.39e-92	-0.593169	0.311	0.357	1.14e-87	Epithelial cells	GNAI2	down
PPP2R5C	1.06e-91	-0.543013	0.188	0.249	3.59e-87	Epithelial cells	PPP2R5C	down
MOB1A	3.28e-91	-0.433956	0.228	0.288	1.1e-86	Epithelial cells	MOB1A	down
ARHGDIA	3.53e-91	-0.453121	0.227	0.286	1.19e-86	Epithelial cells	ARHGDIA	down
IER5	1e-90	-0.448411	0.08	0.139	3.38e-86	Epithelial cells	IER5	down
ATM	2.58e-90	-0.440826	0.114	0.174	8.68e-86	Epithelial cells	ATM	down
RABGAP1L	5.52e-90	-0.290055	0.07	0.128	1.86e-85	Epithelial cells	RABGAP1L	down
MT1F	2.42e-89	0.286225	0.176	0.11	8.15e-85	Epithelial cells	MT1F	up
SMCHD1	2.66e-89	-0.517762	0.197	0.261	8.95e-85	Epithelial cells	SMCHD1	down
SP100	4.07e-89	-0.413124	0.228	0.292	1.37e-84	Epithelial cells	SP100	down
CNOT6L	4.71e-89	-0.460277	0.105	0.162	1.59e-84	Epithelial cells	CNOT6L	down
CMC1	6.97e-89	-0.78719	0.113	0.171	2.35e-84	Epithelial cells	CMC1	down
CCDC107	6.97e-89	-0.416037	0.109	0.169	2.35e-84	Epithelial cells	CCDC107	down
LIPA	1.25e-88	-0.394197	0.059	0.11	4.2e-84	Epithelial cells	LIPA	down
DUSP4	9.51e-88	-0.615361	0.075	0.128	3.21e-83	Epithelial cells	DUSP4	down
RSU1	2.81e-87	-0.322335	0.07	0.124	9.46e-83	Epithelial cells	RSU1	down
NECAP2	1.7e-85	-0.340885	0.099	0.158	5.72e-81	Epithelial cells	NECAP2	down
CCDC109B	2.65e-85	-0.318725	0.084	0.14	8.94e-81	Epithelial cells	CCDC109B	down
HIST1H1D	9.46e-85	-0.362916	0.063	0.117	3.19e-80	Epithelial cells	HIST1H1D	down
ETS2	9.86e-85	-0.510431	0.1	0.156	3.32e-80	Epithelial cells	ETS2	down
MT2A	1.89e-81	-1.19079	0.593	0.59	6.37e-77	Epithelial cells	MT2A	down
IKZF3	2.54e-80	-0.457722	0.068	0.117	8.56e-76	Epithelial cells	IKZF3	down
GBP2	1.08e-79	-0.389791	0.102	0.158	3.62e-75	Epithelial cells	GBP2	down
UBE2N	1.29e-79	-0.436721	0.199	0.252	4.35e-75	Epithelial cells	UBE2N	down
CCND3	1.69e-79	-0.527074	0.206	0.256	5.69e-75	Epithelial cells	CCND3	down
H2AFZ	2.33e-79	-0.502892	0.414	0.44	7.85e-75	Epithelial cells	H2AFZ	down
POLR2G	1.97e-78	-0.34953	0.092	0.145	6.65e-74	Epithelial cells	POLR2G	down
SRSF2	2.81e-78	-0.465453	0.335	0.374	9.45e-74	Epithelial cells	SRSF2	down
SH3BP5	9.87e-78	-0.326268	0.058	0.106	3.33e-73	Epithelial cells	SH3BP5	down
SSR2	5.68e-77	-0.352509	0.385	0.423	1.92e-72	Epithelial cells	SSR2	down
PLAUR	9.7e-77	-0.464545	0.083	0.138	3.27e-72	Epithelial cells	PLAUR	down
DGKZ	3.15e-76	-0.338589	0.058	0.105	1.06e-71	Epithelial cells	DGKZ	down
PLSCR1	1.07e-75	-0.348873	0.14	0.2	3.61e-71	Epithelial cells	PLSCR1	down
PNP	1.15e-75	0.321266	0.123	0.075	3.88e-71	Epithelial cells	PNP	up
EEF1D	1.57e-75	-0.256473	0.725	0.74	5.3e-71	Epithelial cells	EEF1D	down
QKI	1.26e-73	-0.357677	0.099	0.153	4.26e-69	Epithelial cells	QKI	down
KLF9	6.87e-73	-0.357706	0.059	0.104	2.31e-68	Epithelial cells	KLF9	down
MAP2K1	6.94e-73	-0.263972	0.062	0.109	2.34e-68	Epithelial cells	MAP2K1	down
PTBP3	8.98e-73	-0.310742	0.093	0.146	3.02e-68	Epithelial cells	PTBP3	down
PSMB8	5.15e-72	-0.330068	0.28	0.336	1.74e-67	Epithelial cells	PSMB8	down
GSTK1	1.91e-71	-0.374436	0.306	0.352	6.43e-67	Epithelial cells	GSTK1	down
PHF20	1.82e-70	-0.365272	0.116	0.168	6.12e-66	Epithelial cells	PHF20	down
HIGD2A	4.37e-70	-0.355442	0.302	0.347	1.47e-65	Epithelial cells	HIGD2A	down
FOSL2	5.6e-70	-0.34896	0.061	0.107	1.89e-65	Epithelial cells	FOSL2	down
HLA-DMB	1.16e-68	-0.478366	0.15	0.201	3.9e-64	Epithelial cells	HLA-DMB	down
ADPGK	2.4e-68	-0.266153	0.061	0.107	8.07e-64	Epithelial cells	ADPGK	down
PICALM	3.95e-68	-0.31363	0.098	0.149	1.33e-63	Epithelial cells	PICALM	down
RAB31	6.61e-68	-0.309311	0.069	0.116	2.23e-63	Epithelial cells	RAB31	down
BAZ1A	1.15e-67	-0.363347	0.141	0.195	3.87e-63	Epithelial cells	BAZ1A	down
CD44	4.89e-67	-0.506383	0.379	0.402	1.65e-62	Epithelial cells	CD44	down
ATP2B1	5.8e-67	-0.407846	0.137	0.189	1.95e-62	Epithelial cells	ATP2B1	down
RPL36AL	1.29e-66	-0.267825	0.674	0.699	4.36e-62	Epithelial cells	RPL36AL	down
C20orf27	2.45e-66	-0.369484	0.072	0.117	8.27e-62	Epithelial cells	C20orf27	down
PRR13	4.85e-66	-0.4021	0.309	0.345	1.63e-61	Epithelial cells	PRR13	down
CNTRL	5.65e-66	-0.323943	0.075	0.121	1.9e-61	Epithelial cells	CNTRL	down
TMEM109	2.54e-65	-0.322365	0.088	0.136	8.55e-61	Epithelial cells	TMEM109	down
CD58	3e-65	-0.313322	0.096	0.146	1.01e-60	Epithelial cells	CD58	down
PPT1	3.75e-65	-0.447215	0.163	0.21	1.26e-60	Epithelial cells	PPT1	down
ZYX	6.7e-65	-0.348207	0.118	0.169	2.26e-60	Epithelial cells	ZYX	down
KCTD12	2.82e-64	-0.26566	0.075	0.124	9.5e-60	Epithelial cells	KCTD12	down
RPS3A	8.65e-64	-0.251434	0.934	0.928	2.91e-59	Epithelial cells	RPS3A	down
DUSP1	1.05e-63	-0.316218	0.653	0.702	3.53e-59	Epithelial cells	DUSP1	down
UBE2D3	1.18e-63	-0.374998	0.415	0.435	3.97e-59	Epithelial cells	UBE2D3	down
IQGAP2	1.04e-62	-0.369856	0.08	0.125	3.5e-58	Epithelial cells	IQGAP2	down
ALDH2	2.13e-62	-0.328722	0.067	0.111	7.17e-58	Epithelial cells	ALDH2	down
EEF1B2	1.26e-61	-0.257066	0.732	0.706	4.24e-57	Epithelial cells	EEF1B2	down
LPAR6	1.64e-61	-0.432146	0.113	0.159	5.52e-57	Epithelial cells	LPAR6	down
GADD45B	3.56e-61	-0.599893	0.291	0.337	1.2e-56	Epithelial cells	GADD45B	down
CTSZ	4.56e-61	-0.707455	0.169	0.213	1.54e-56	Epithelial cells	CTSZ	down
C15orf48	8.88e-61	-0.749656	0.071	0.115	2.99e-56	Epithelial cells	C15orf48	down
ID2	1.85e-60	-0.707136	0.314	0.342	6.23e-56	Epithelial cells	ID2	down
HNRNPC	6.19e-60	-0.346005	0.391	0.415	2.09e-55	Epithelial cells	HNRNPC	down
CMTM7	1.14e-59	-0.302915	0.079	0.122	3.85e-55	Epithelial cells	CMTM7	down
TLN1	1.39e-59	-0.373079	0.198	0.249	4.67e-55	Epithelial cells	TLN1	down
S100A4	1.95e-59	0.481	0.831	0.787	6.56e-55	Epithelial cells	S100A4	up
PPP1R15A	2.18e-59	-0.375367	0.319	0.376	7.35e-55	Epithelial cells	PPP1R15A	down
PPP2R3C	2.19e-59	-0.291561	0.067	0.108	7.37e-55	Epithelial cells	PPP2R3C	down
DDX21	2.35e-59	-0.34991	0.171	0.221	7.92e-55	Epithelial cells	DDX21	down
TPP1	9.31e-59	-0.34412	0.118	0.164	3.14e-54	Epithelial cells	TPP1	down
IFI44	1.42e-57	-0.287986	0.093	0.14	4.78e-53	Epithelial cells	IFI44	down
TRAPPC1	2.09e-57	-0.402612	0.296	0.327	7.03e-53	Epithelial cells	TRAPPC1	down
SKIL	2.77e-57	-0.407457	0.164	0.211	9.33e-53	Epithelial cells	SKIL	down
PPP1CA	5.5e-57	-0.408499	0.219	0.259	1.85e-52	Epithelial cells	PPP1CA	down
GABPB1	1.47e-56	-0.358996	0.117	0.161	4.96e-52	Epithelial cells	GABPB1	down
DNMT1	5.04e-56	-0.332571	0.109	0.155	1.7e-51	Epithelial cells	DNMT1	down
CHST12	1.14e-55	-0.407154	0.073	0.112	3.84e-51	Epithelial cells	CHST12	down
RBPJ	1.85e-55	-0.488129	0.225	0.265	6.24e-51	Epithelial cells	RBPJ	down
KDM6B	7.49e-55	-0.330212	0.065	0.104	2.53e-50	Epithelial cells	KDM6B	down
DENND2D	1.24e-54	-0.313292	0.075	0.115	4.17e-50	Epithelial cells	DENND2D	down
USP15	3.91e-54	-0.403409	0.186	0.23	1.32e-49	Epithelial cells	USP15	down
ARL6IP5	4.26e-54	-0.347222	0.516	0.513	1.44e-49	Epithelial cells	ARL6IP5	down
PRMT2	4.61e-54	-0.381537	0.181	0.224	1.55e-49	Epithelial cells	PRMT2	down
HSPA8	5.08e-54	-0.288498	0.688	0.673	1.71e-49	Epithelial cells	HSPA8	down
TAPBP	8.27e-54	-0.366777	0.227	0.271	2.79e-49	Epithelial cells	TAPBP	down
MEF2A	8.46e-54	-0.407579	0.123	0.167	2.85e-49	Epithelial cells	MEF2A	down
TACC1	6.39e-53	-0.335157	0.126	0.172	2.15e-48	Epithelial cells	TACC1	down
DDX3X	9e-53	-0.429312	0.285	0.318	3.03e-48	Epithelial cells	DDX3X	down
PLXDC2	1.04e-52	-0.33322	0.075	0.116	3.51e-48	Epithelial cells	PLXDC2	down
RAB8A	1.56e-52	-0.301353	0.119	0.164	5.27e-48	Epithelial cells	RAB8A	down
C17orf62	2.93e-52	-0.307031	0.108	0.151	9.86e-48	Epithelial cells	C17orf62	down
COMMD8	1.31e-50	-0.303918	0.092	0.133	4.42e-46	Epithelial cells	COMMD8	down
SLFN5	1.36e-50	-0.263417	0.123	0.173	4.58e-46	Epithelial cells	SLFN5	down
IFIT1	4.31e-50	0.330078	0.115	0.076	1.45e-45	Epithelial cells	IFIT1	up
OPTN	8.9e-50	-0.309305	0.1	0.143	3e-45	Epithelial cells	OPTN	down
RECQL	9.77e-50	-0.267362	0.084	0.125	3.29e-45	Epithelial cells	RECQL	down
C9orf142	1.14e-49	-0.48086	0.237	0.269	3.83e-45	Epithelial cells	C9orf142	down
H2AFV	1.86e-49	-0.38313	0.276	0.308	6.25e-45	Epithelial cells	H2AFV	down
RPLP0	4.59e-48	-0.289555	0.767	0.718	1.55e-43	Epithelial cells	RPLP0	down
PIM3	6.13e-48	-0.303658	0.093	0.134	2.07e-43	Epithelial cells	PIM3	down
CCNL1	2.82e-47	-0.339572	0.279	0.318	9.52e-43	Epithelial cells	CCNL1	down
SRSF3	1.47e-46	-0.367711	0.507	0.498	4.96e-42	Epithelial cells	SRSF3	down
KLF4	3.27e-46	-0.375119	0.074	0.111	1.1e-41	Epithelial cells	KLF4	down
CDKN1B	6.01e-46	-0.348244	0.135	0.176	2.02e-41	Epithelial cells	CDKN1B	down
CMC2	1.32e-45	-0.344731	0.126	0.165	4.46e-41	Epithelial cells	CMC2	down
TSC22D4	6.99e-44	-0.294115	0.08	0.115	2.36e-39	Epithelial cells	TSC22D4	down
DBNL	1.53e-43	-0.29215	0.135	0.174	5.14e-39	Epithelial cells	DBNL	down
C9orf78	2.17e-43	-0.366329	0.181	0.217	7.3e-39	Epithelial cells	C9orf78	down
CHD1	8.16e-43	-0.312562	0.141	0.182	2.75e-38	Epithelial cells	CHD1	down
NOP10	9.04e-43	-0.346653	0.366	0.38	3.05e-38	Epithelial cells	NOP10	down
RORA	1.9e-42	-0.416551	0.097	0.131	6.4e-38	Epithelial cells	RORA	down
RASA2	1.77e-41	-0.266889	0.071	0.105	5.98e-37	Epithelial cells	RASA2	down
GNAI3	5.4e-41	-0.290785	0.132	0.17	1.82e-36	Epithelial cells	GNAI3	down
ATP1B3	5.48e-41	-0.394114	0.183	0.217	1.85e-36	Epithelial cells	ATP1B3	down
NAP1L1	6.01e-41	-0.324221	0.462	0.461	2.03e-36	Epithelial cells	NAP1L1	down
AP2S1	1.24e-40	-0.467775	0.294	0.308	4.19e-36	Epithelial cells	AP2S1	down
SEC14L1	1.54e-40	-0.344704	0.117	0.154	5.18e-36	Epithelial cells	SEC14L1	down
CFD	1.63e-40	-1.12871	0.078	0.11	5.48e-36	Epithelial cells	CFD	down
HNRNPK	1.92e-40	-0.28846	0.499	0.497	6.47e-36	Epithelial cells	HNRNPK	down
CCNH	2.69e-40	-0.371898	0.13	0.165	9.07e-36	Epithelial cells	CCNH	down
TRABD	5.13e-40	-0.295091	0.11	0.146	1.73e-35	Epithelial cells	TRABD	down
CLDND1	1.7e-39	-0.373414	0.119	0.153	5.73e-35	Epithelial cells	CLDND1	down
PRCP	6.88e-39	-0.325046	0.077	0.11	2.32e-34	Epithelial cells	PRCP	down
PLP2	3.59e-38	-0.382523	0.232	0.262	1.21e-33	Epithelial cells	PLP2	down
NXT1	8.03e-38	-0.273373	0.081	0.113	2.7e-33	Epithelial cells	NXT1	down
[truncated: 109 more rows]
